# Supplementary material for: Development of Prognostic Indicator Based on Autophagy-Related lncRNA Analysis in Colon Adenocarcinoma
Source: Biomed Res Int. 2020 Sep 2;2020:9807918. doi: 10.1155/2020/9807918 (PMC7486634; doi:10.1155/2020/9807918)
Supplement: Supplementary 1 — Table S1: The expression profile of autophagy-related gene in colon adenocarcinoma. [file 9807918.f1.zip › Legend of Table S1.txt]

Table S1: The expression profile of autophagy-related gene in colon adenocarcinoma.
