# Supplementary material for: Development of Prognostic Indicator Based on Autophagy-Related lncRNA Analysis in Colon Adenocarcinoma
Source: Biomed Res Int. 2020 Sep 2;2020:9807918. doi: 10.1155/2020/9807918 (PMC7486634; doi:10.1155/2020/9807918)
Supplement: Supplementary 1 — Table S1: The expression profile of autophagy-related gene in colon adenocarcinoma. [file 9807918.f1.zip › Table S1 The expression profile of autophagy-related gene in colon adenocarcinoma.xlsx]

## Sheet: Table S1
ID	TCGA-A6-2671-11A-01R-A32Z-07	TCGA-AA-3527-11A-01R-A32Z-07	TCGA-AA-3662-11A-01R-1723-07	TCGA-A6-2683-11A-01R-A32Z-07	TCGA-AA-3511-11A-01R-1839-07	TCGA-A6-2680-11A-01R-A32Z-07	TCGA-A6-2685-11A-01R-A32Z-07	TCGA-AA-3517-11A-01R-A32Z-07	TCGA-AA-3520-11A-01R-A32Z-07	TCGA-AA-3655-11A-01R-1723-07	TCGA-AA-3534-11A-01R-A32Z-07	TCGA-A6-5665-11A-01R-1653-07	TCGA-AA-3522-11A-01R-A32Z-07	TCGA-AZ-6603-11A-02R-1839-07	TCGA-AZ-6599-11A-01R-1774-07	TCGA-AA-3697-11A-01R-1723-07	TCGA-A6-2679-11A-01R-A32Z-07	TCGA-AZ-6601-11A-01R-1774-07	TCGA-AA-3712-11A-01R-1723-07	TCGA-A6-5662-11A-01R-1653-07	TCGA-A6-2682-11A-01R-A32Z-07	TCGA-A6-5659-11A-01R-1653-07	TCGA-AZ-6598-11A-01R-1774-07	TCGA-AA-3516-11A-01R-A32Z-07	TCGA-A6-2675-11A-01R-1723-07	TCGA-AZ-6600-11A-01R-1774-07	TCGA-AA-3531-11A-01R-A32Z-07	TCGA-A6-2686-11A-01R-A32Z-07	TCGA-AA-3713-11A-01R-1723-07	TCGA-F4-6704-11A-01R-1839-07	TCGA-A6-2684-11A-01R-A32Z-07	TCGA-A6-2678-11A-01R-A32Z-07	TCGA-AA-3518-11A-01R-1672-07	TCGA-AZ-6605-11A-01R-1839-07	TCGA-AA-3663-11A-01R-1723-07	TCGA-AA-3660-11A-01R-1723-07	TCGA-AA-3525-11A-01R-A32Z-07	TCGA-A6-5667-11A-01R-1723-07	TCGA-AA-3514-11A-01R-A32Z-07	TCGA-AA-3489-11A-01R-1839-07	TCGA-AA-3496-11A-01R-1839-07	TCGA-AA-3663-01A-01R-1723-07	TCGA-A6-5659-01A-01R-1653-07	TCGA-A6-6648-01A-11R-1774-07	TCGA-D5-6530-01A-11R-1723-07	TCGA-NH-A5IV-01A-42R-A37K-07	TCGA-A6-2677-01A-01R-0821-07	TCGA-DM-A1D7-01A-11R-A155-07	TCGA-AA-3989-01A-01R-1022-07
AMBRA1	7.06241	9.24827	4.99872	6.66272	6.1903	5.05498	6.77471	8.12892	7.08766	4.91217	7.77465	7.80647	7.69523	6.11608	6.34672	6.29073	7.75962	5.92302	5.64436	5.24946	7.70599	7.01712	6.43092	8.1152	6.09433	6.39497	7.23506	7.96404	4.03666	5.01342	7.23219	7.06845	7.36899	4.67313	6.33343	5.06518	7.69785	5.83396	8.22924	3.82867	6.02349	3.78524	5.21599	7.45637	6.53108	6.28175	5.43049	5.26899	6.43134
APOL1	14.9867	34.0116	11.7559	11.3311	10.6387	20.4865	21.5849	16.2677	16.8837	13.8117	14.8812	12.2814	10.5799	62.4831	21.7489	28.8531	42.8194	22.5836	10.5175	13.7273	12.3792	10.1849	25.7338	34.5666	15.4124	19.0255	24.7976	11.9959	7.67368	10.7889	12.0364	8.96254	13.4398	15.3805	17.9297	16.7419	29.7447	10.567	119.853	74.7042	12.4412	17.6747	14.6504	9.28166	84.5697	17.0134	9.42907	13.8995	18.5908
ARNT	8.84527	9.81741	11.0492	10.5379	10.9687	6.72313	7.93832	10.5001	9.02488	9.66463	9.90847	8.37808	10.4432	11.1928	10.7147	7.97488	8.87254	9.23698	10.3477	9.49833	10.1409	8.90544	8.13528	7.75735	9.75011	10.0625	9.12309	9.11793	6.66255	7.6245	7.76692	10.9574	9.07872	10.2435	9.5512	8.24109	10.0078	9.56837	8.69407	7.51784	10.3372	5.26528	7.3242	8.45695	10.7563	8.70716	9.28053	5.49329	3.51978
ARSA	37.2985	18.5576	28.9306	28.5684	27.6983	31.7208	27.2176	29.1833	28.4995	19.9562	38.3967	27.751	26.9564	22.7496	34.6698	19.5688	40.7372	19.0395	29.8705	16.9049	37.9198	26.8734	24.831	45.9843	11.294	23.4606	30.8298	31.8024	17.618	13.4092	32.0512	24.85	28.7268	8.12034	24.0317	17.5497	36.6382	33.2661	23.4844	14.0225	12.3692	11.8065	8.45986	6.42936	15.152	15.5315	7.08704	12.7989	26.1116
ARSB	1.76403	2.1812	2.27528	1.81056	2.4475	1.01242	2.33421	1.67001	1.88286	2.36846	2.14981	1.203	2.13824	3.4765	2.41146	2.76701	2.03346	2.66376	2.56777	2.36867	1.88615	1.53182	1.72858	1.3176	2.61238	2.18304	1.45074	1.67578	1.53345	2.44319	1.34453	2.20084	1.49761	2.86075	2.28465	1.95029	1.71594	2.2906	1.86296	2.38041	2.38301	2.43262	1.23843	1.72164	3.2098	3.57308	1.51645	1.83145	2.62806
ATF4	90.2078	77.8312	123.252	65.395	77.3533	90.359	65.0495	64.7957	58.9507	132.225	78.1192	92.0437	77.8969	120.026	54.461	123.915	80.823	93.7985	94.1985	102.886	89.853	81.2392	97.9343	67.8473	105.412	97.7107	76.373	66.0352	142.785	130.534	75.4109	77.2664	62.678	138.212	96.5169	94.4747	107.304	88.8244	67.0856	143.663	132.768	126.694	106.917	118.04	116.903	175.243	127.881	223.483	135.03
ATF6	6.9768	8.26403	8.19783	8.65674	8.49426	6.62661	7.83806	7.80331	7.75589	6.86722	8.32424	6.65781	7.8229	7.96823	9.52041	9.36297	7.15998	7.59455	7.7736	7.89843	7.544	7.55032	6.28066	5.91199	9.12241	8.83295	6.51335	7.91488	6.84183	8.7685	6.67267	8.14252	7.32958	7.25004	7.36007	6.25863	7.06184	7.63815	7.84539	7.12124	7.53814	9.79358	8.3029	13.4343	10.3868	7.39324	12.9826	5.62612	6.39741
ATG10	0.991924	1.08347	1.4891	1.21861	1.08813	0.746758	1.16974	1.04202	1.02683	1.68729	1.16835	1.00012	1.30929	1.68709	1.59437	1.22839	1.20452	0.993012	0.975124	1.20295	0.890842	1.08133	1.80764	1.07239	1.08954	1.21391	0.765056	1.05803	2.0092	1.64502	1.11098	1.1212	0.945576	1.09612	1.19899	1.53869	1.32972	1.13868	1.15744	1.93806	1.15217	1.54109	1.25011	0.987766	0.684407	1.79807	1.20847	1.50686	0.914252
ATG12	2.88711	3.14661	5.04863	3.08689	3.81238	4.73712	3.00697	2.88272	2.93777	5.17719	3.23895	3.87884	3.50204	3.80922	3.38233	3.49394	2.80039	3.90828	4.26206	4.09096	3.12375	3.69416	3.30531	3.00935	3.29725	3.60788	2.96945	3.08518	6.02523	3.66417	3.02188	4.2633	2.98939	3.80569	3.29464	5.20568	3.72264	3.07018	3.31631	6.1569	4.62897	6.00974	4.28399	4.18189	5.84282	5.5428	6.15756	4.85906	3.66443
ATG16L1	5.71878	6.07144	6.34284	5.17091	5.5575	6.00033	5.77332	5.70627	5.28768	6.02637	5.98364	5.84617	5.96472	5.3578	4.92255	5.31008	5.58559	5.82916	7.66204	5.03895	6.97292	6.28991	5.10128	6.35025	6.73171	6.22211	5.93471	5.45068	6.09216	5.96658	4.92215	5.38262	5.81185	4.97933	5.24715	7.38245	6.13897	7.28196	5.21181	5.4972	5.04206	12.8846	9.89871	8.53347	7.36986	8.50878	9.63733	10.3111	8.12182
ATG16L2	1.13879	0.966262	2.59174	1.18081	2.51636	1.07451	1.38023	1.36539	1.26913	1.42435	2.4229	1.61958	1.65416	1.94541	2.46907	1.26473	1.74594	2.16289	3.84593	1.44972	1.93735	1.36286	3.56654	0.889679	0.872882	1.97013	1.04333	1.11883	1.39083	1.62261	1.64159	1.87247	1.15572	0.986108	2.07822	1.26588	3.06272	4.04625	0.746979	0.793817	0.999865	1.01326	0.531015	1.62195	2.55345	7.61367	1.73215	2.50128	2.19799
ATG2A	10.7752	9.30246	6.19263	6.43087	8.05891	7.7224	9.17597	8.8533	8.15262	5.37333	9.63915	8.50524	8.79603	5.81659	7.68224	7.33356	9.99422	6.36326	8.29972	5.52846	10.3831	6.82598	6.77202	10.9838	7.76909	6.93795	11.7836	7.65182	3.26736	5.54976	8.03063	7.70762	8.59164	4.83521	5.57295	6.70923	11.383	8.56599	9.15225	3.5529	5.4993	4.78687	4.78025	7.36005	9.19599	5.99675	4.93198	5.05763	7.22583
ATG2B	2.01338	2.71307	1.99755	2.43779	2.46671	3.03506	2.25368	2.01954	2.35297	1.47835	2.78351	2.38097	2.82691	2.86693	3.00739	1.91382	2.18174	2.58413	2.93375	2.23063	2.67022	2.59851	2.52399	1.95633	2.31599	2.32988	1.9586	2.24347	1.2353	2.04919	1.96084	2.81615	2.20252	2.39998	1.96566	1.53318	2.64078	2.28962	2.55437	1.39024	2.49929	0.851484	2.33836	3.94965	2.61505	2.34515	1.04962	1.57026	1.12263
ATG3	7.62247	8.02075	8.9109	9.15231	9.46439	8.18131	9.06563	7.87461	8.25654	11.2108	8.20447	6.86672	8.61267	8.37575	7.73042	10.8823	7.92623	7.65924	8.2564	7.77269	7.92286	9.76162	6.5191	5.87394	6.40962	8.12421	7.21992	8.33747	14.3117	9.4692	8.06043	7.96659	7.20132	4.67528	7.82876	11.0128	8.81372	7.22326	8.83012	12.9294	8.21342	9.55596	11.3604	12.9601	9.14255	11.6004	10.2488	13.4677	6.83702
ATG4A	7.20711	8.05818	7.77962	8.83741	8.49773	7.49653	8.36605	6.1767	8.85796	8.56945	7.81402	8.04649	8.31232	6.67507	7.97557	12.6709	7.89926	6.66418	9.02184	7.39179	8.45121	10.4678	5.90206	8.98091	6.4001	7.17481	8.27689	8.76695	13.0784	8.9449	8.65214	7.78411	6.9493	3.21161	6.91857	8.15275	9.93311	7.24698	9.70893	10.0777	7.27906	10.7739	9.56367	5.54693	4.01346	3.02406	2.32472	3.55036	4.68853
ATG4B	8.46399	6.40061	11.1682	6.26328	9.70941	6.7985	7.48093	7.17283	6.60062	9.98119	7.61447	7.32101	7.54331	6.26922	7.11669	6.85688	7.39005	8.07764	13.5077	7.83539	8.0629	5.84009	8.72194	5.88753	6.86996	10.4118	7.01772	6.29857	7.21811	6.69709	7.3597	8.12075	7.42318	4.59475	7.32878	8.77398	8.46977	13.5001	5.47714	5.47781	5.74522	9.36212	8.94254	7.74503	8.40266	13.8631	8.95565	12.814	12.7159
ATG4C	2.68284	3.03174	4.93645	5.02443	3.7786	2.09836	3.20336	3.61511	3.33924	5.02999	3.93558	2.41514	3.49064	4.27891	3.76263	3.5588	3.30953	2.99998	3.77049	4.34516	3.2023	4.08971	2.71294	2.39386	2.22839	2.63635	1.97489	3.39078	5.85361	3.50542	3.27668	3.76098	2.79419	2.98963	2.5778	4.24676	4.04026	2.71993	3.24469	4.73077	4.56358	3.45153	4.4006	4.17561	3.04283	5.24852	6.2109	3.13003	1.43562
ATG4D	24.8403	20.052	15.2654	14.6907	15.1659	23.6055	21.5216	19.2521	17.1685	19.6119	19.0736	25.9929	21.3352	8.88642	14.7966	22.1823	21.3005	15.8842	23.2446	13.1258	21.2776	18.9622	17.8653	21.546	9.95748	22.5007	26.6298	20.2537	20.8224	15.9676	24.9715	21.0427	19.504	5.49612	12.946	21.0863	20.131	25.7012	21.0739	10.7046	11.4052	9.11992	8.17102	10.0807	9.21897	12.7732	9.53923	15.7271	22.653
ATG5	12.2572	13.4012	19.1384	14.8925	13.9976	13.743	12.9772	12.738	14.4796	20.0067	13.5076	12.0539	14.8215	10.4026	12.5885	15.6974	12.0915	11.266	14.4671	14.5573	13.1135	16.5606	10.7395	13.5843	11.3268	12.4257	12.7564	13.7837	29.2628	12.5899	13.4459	13.7511	13.0586	9.10716	11.826	19.4934	13.6485	13.3282	13.6553	20.941	14.7416	19.1902	19.8144	16.2298	13.0251	13.1807	17.7965	10.9779	12.4479
ATG7	2.70705	2.85418	3.02121	2.8948	2.9613	1.90699	2.68715	2.95344	3.02805	3.06452	2.8757	2.36057	3.22908	2.99715	2.84137	3.20191	2.94569	2.16294	2.84178	2.32574	3.05397	2.49344	2.37286	2.36461	2.27612	2.6651	2.45048	2.78079	2.88825	2.52329	3.08181	2.94989	2.68805	1.75669	2.73169	2.77143	2.89178	2.6688	3.06395	3.10849	2.79392	3.49165	3.00738	2.87858	0.804828	3.50172	3.87243	2.0534	2.41028
ATG9A	16.0686	13.5269	10.7804	12.561	12.2101	15.6457	12.6061	14.7598	13.808	8.98824	13.2259	12.4034	14.2543	10.1287	13.0195	10.3614	12.8419	11.7083	12.2846	10.8297	13.3042	10.7683	11.7967	14.8021	11.4049	9.86421	14.4909	13.4754	6.79035	10.0092	15.7569	14.6203	14.2254	9.37191	11.5205	10.7774	11.3406	13.4976	12.257	5.77313	10.9222	9.01769	10.3447	8.66095	10.1587	10.5013	9.89669	10.6735	15.1749
ATG9B	0.0738978	0.0385851	0.0443356	0.0155074	0.107177	0.0624677	0.0588235	0.103872	0.0397946	0.10126	0.11739	0.0778562	0.0322232	0.0809341	0.101721	0.132761	0.0633526	0.104524	0.0895901	0.167223	0.0924897	0.0572245	0.0776573	0.0346539	0.0666175	0.228247	0.0603543	0.0404295	0.0870373	0.200365	0.0378892	0.0844277	0.0571562	0.0385383	0.122183	0.0702018	0.093281	0.0974208	0.0464394	0.0713537	0.120181	0.104472	1.53237	1.00703	0.153176	0.447266	0.498002	0.710129	0.713313
ATIC	15.862	16.2488	19.7521	21.2698	21.9174	12.6812	22.5044	17.1089	19.1076	16.7651	19.7492	11.5093	20.4695	17.7472	18.6367	23.1127	17.2518	19.6312	18.0692	15.0006	18.7603	15.9832	18.6271	9.80199	16.993	19.4775	10.0238	17.0906	16.8519	22.6087	16.4752	16.3422	15.2414	11.041	17.7459	16.2765	19.8354	16.5449	18.4552	16.7421	18.2872	28.9751	49.1738	49.9268	28.4946	33.0886	45.9524	38.9245	44.8441
BAG1	17.6395	14.3343	23.2302	15.67	21.5527	15.1088	19.071	14.768	16.7048	19.8549	15.9635	15.2996	15.5354	13.5413	13.0668	18.5235	15.5912	14.5379	19.5817	16.01	18.2246	16.5115	13.7273	15.2824	17.8644	23.0811	15.2195	15.6221	25.0816	22.9875	16.7081	18.1891	15.0046	10.961	14.6327	19.1793	16.0537	21.6598	10.9993	19.2616	15.091	18.9874	10.3174	18.2164	18.014	30.2941	12.6986	16.1226	16.7301
BAG3	18.1287	16.8978	14.2626	15.0688	12.9429	13.7564	17.2251	13.2708	9.29951	14.5169	12.9377	7.3058	10.1422	28.3215	20.6395	24.3323	14.1419	22.1699	11.2888	33.4152	15.1018	12.5295	22.2436	12.7695	40.1936	25.8738	15.7321	10.0057	44.6135	42.8298	10.2255	12.8183	11.9818	33.7498	19.6711	11.4125	16.0596	14.5918	17.0505	22.7342	27.0853	20.5291	15.685	7.51855	22.5023	23.2516	9.72176	14.0228	11.0865
BAK1	34.0665	48.4486	25.0486	34.9326	18.8312	32.0845	41.6081	32.0161	33.3686	48.6364	47.8228	28.8466	35.2386	29.9525	30.6543	40.5996	47.3305	31.8505	37.3154	20.6251	30.8442	36.5024	30.4195	45.1633	22.359	38.1692	39.5369	45.0305	60.7075	28.8122	45.4304	35.016	33.8359	11.0511	33.8308	48.1341	62.3504	35.4558	65.2927	48.675	26.9784	70.2371	14.3585	20.08	29.4515	19.8919	12.0896	22.4168	34.9084
BAX	28.8511	25.7256	20.5216	21.2364	30.3082	29.1253	31.4154	28.2487	26.2432	29.5874	25.7524	27.6143	25.3656	21.7119	22.5632	31.6533	28.7563	22.1467	23.8235	18.5993	28.7966	24.9124	27.0135	29.0086	16.1008	25.0144	30.7091	26.0994	29.2329	26.8297	27.7765	19.4511	23.9149	9.20326	22.3265	28.5615	30.9947	26.2166	27.8209	25.6804	18.653	63.5996	39.9689	30.6731	10.4153	30.5725	23.1208	48.6747	52.3751
BCL2	3.27474	3.51998	4.22427	4.34875	5.07414	1.70077	3.86352	4.4741	4.09777	2.95504	5.27707	2.59972	4.37555	3.95077	3.97855	2.54598	3.9061	4.41857	3.63337	3.90402	3.85351	3.20209	4.0892	2.17817	2.74948	4.26229	1.84646	2.61882	1.55038	3.4022	2.99594	5.07525	3.94544	2.55992	3.81353	2.8279	4.44524	3.62167	3.1993	2.35158	4.07359	0.66671	0.596967	2.81044	5.67428	9.28457	0.548866	0.646496	0.827749
BCL2L1	28.1802	23.3606	26.5052	20.2213	21.6442	42.8635	22.3941	27.4389	22.8482	24.9822	22.7938	24.8167	23.1701	20.0563	20.7106	25.4833	24.3384	19.2234	23.3727	18.2027	24.5819	21.3724	21.5771	29.9447	19.5418	22.8054	27.9476	22.1282	23.5753	16.939	25.641	22.1274	23.6229	13.7369	20.162	30.6728	23.2475	24.495	21.8017	20.0251	21.2017	31.1431	76.6714	44.3799	26.6351	30.7959	36.1636	52.9401	47.8486
BECN1	13.0412	12.1989	13.51	13.2731	13.3057	11.4241	13.6248	11.8143	13.1314	14.0769	13.1875	11.0677	13.4462	10.9602	12.8723	13.0374	12.3626	11.6127	14.9936	11.6674	13.4244	11.822	11.9342	12.5475	11.6531	11.8263	12.7469	13.941	10.5884	11.9977	13.2451	13.6038	12.865	7.74402	10.8029	13.6884	13.4701	14.9791	12.4994	11.2671	11.7876	10.2736	14.72	15.1226	13.264	13.9077	16.2611	11.0963	8.59501
BID	5.8267	6.78956	8.9919	5.49855	7.01952	3.78523	6.84144	6.15042	6.76274	10.0235	6.98605	3.50138	5.67419	6.34056	6.64642	9.35116	6.54728	5.47414	6.51643	4.74882	6.59519	5.64842	5.89923	3.74754	4.6976	7.01453	4.84508	6.04409	13.4725	6.88133	6.3542	5.49263	5.18475	2.22976	6.11796	9.49845	8.0969	5.81889	6.8007	10.3649	4.94236	21.0997	10.2825	16.0633	11.2243	10.0652	15.4693	24.4377	19.2283
BIRC5	5.94679	5.05324	4.49685	7.66796	7.81585	2.88184	10.2843	4.27989	5.02581	9.90896	5.54569	2.86318	6.82863	8.74511	8.69072	11.916	7.9821	8.24732	5.81725	6.54277	5.5685	2.7268	9.40678	1.93362	2.78999	6.11127	3.77597	6.83213	14.6868	10.1151	5.08313	4.0697	3.68384	1.02221	5.21947	10.9225	9.46017	5.39693	13.0552	8.9839	6.00492	40.2669	19.0169	31.5242	19.4654	25.465	44.5614	29.7281	13.7482
BIRC6	5.80234	6.10414	4.36899	5.91078	7.83597	4.22365	6.25852	5.16106	6.22237	3.19317	6.56501	6.80225	6.49466	6.0692	6.85826	4.91934	5.79788	7.2645	6.37862	4.78527	5.71031	6.25483	5.04173	5.12735	6.6636	5.93746	5.41088	5.39608	2.35253	7.10615	3.38046	6.34533	5.36206	3.94794	4.5602	3.12958	6.25012	6.24231	8.28312	2.71524	4.3564	3.3703	7.37278	10.6063	4.78976	7.26456	6.81173	4.6709	4.49479
BNIP1	3.49838	3.0676	3.90608	3.61499	4.00032	2.60532	3.50869	2.94644	3.09223	6.12765	3.01326	2.57335	3.14092	4.10485	3.42328	4.89148	3.30127	3.38571	4.22388	2.95895	3.56041	2.76456	3.95075	1.85724	2.02601	4.82395	2.40774	3.26952	7.61639	4.65236	2.77877	3.2172	2.89171	2.29643	3.32831	5.24049	3.67431	3.84516	3.57308	6.88556	4.7081	7.50405	2.68992	3.38685	4.30822	7.34414	4.66285	5.41573	4.62273
BNIP3	1.62757	1.20607	2.83259	1.35292	1.88129	1.87859	0.842601	1.66975	1.34676	2.67493	1.33115	1.19278	1.45673	3.86601	2.02812	2.07728	1.49481	2.01677	1.81446	4.33145	1.13083	1.69351	2.28813	1.23722	3.3037	1.90951	0.948839	1.25274	1.85185	2.0207	1.0075	2.21566	1.79285	6.07235	3.22746	1.46946	1.23469	1.34212	1.19021	3.72371	4.23721	8.15913	7.30882	5.26677	6.88623	5.73066	0.362284	3.1465	0.707827
BNIP3L	12.196	12.1111	18.5881	14.539	13.9256	15.9255	8.61355	14.7573	12.6793	16.9064	12.6264	10.0014	15.6867	18.2217	17.2301	12.9406	11.4243	8.18928	12.6824	18.6323	12.8217	13.6427	10.9781	13.6188	13.3284	10.8614	12.4933	13.7794	12.9151	8.79489	14.6787	17.8503	19.2389	18.3613	14.1175	16.5174	12.0209	10.3534	10.2848	20.0334	22.9274	29.0965	10.7971	7.32119	18.7084	9.30527	9.88687	6.33358	9.54795
CALCOCO2	21.3312	22.1581	26.2598	22.9919	18.3921	19.4513	26.0825	20.1518	19.9604	25.9604	21.4715	17.6122	23.5097	16.6693	19.8867	19.7804	21.6116	19.5229	24.0187	20.7113	20.511	22.2855	20.1036	19.4161	16.8292	20.0649	23.2459	23.275	19.3949	20.5254	24.923	26.7697	22.0703	11.8893	17.7953	23.6935	25.2708	20.9749	26.5879	21.1612	20.1899	11.0357	11.6357	15.6967	13.6863	13.3569	24.98	11.2006	7.55754
CAMKK2	10.9353	10.1609	12.4688	10.1167	11.9796	13.1153	10.5005	10.0099	10.888	11.8162	11.1028	9.00456	11.1762	10.4412	12.9126	9.07521	10.8471	10.9938	12.6261	10.5572	11.4668	10.5298	10.2425	9.28385	10.4256	10.0261	8.14232	10.8577	9.29512	9.86689	8.94101	12.0567	11.1148	9.13861	10.29	9.60061	10.0338	13.3538	9.64281	9.59906	9.57851	8.80332	10.1119	10.9378	11.8442	14.5712	11.6331	11.6083	9.89997
CANX	79.3938	110.511	109.221	112.945	110.082	101.085	97.4317	84.5514	97.7561	87.1759	100.425	77.0642	90.6988	109.713	104.364	127.939	83.0587	108.786	81.2489	88.2901	92.6463	102.029	76.1591	65.0361	83.3826	105.285	71.7413	91.5614	106.652	121.806	81.092	98.3486	81.2591	72.5069	95.1785	83.9438	86.6933	83.5607	122.121	115.794	107.088	197.512	114.077	129.067	171.013	69.6696	209.419	116.782	121.516
CAPN1	63.4924	63.3984	42.4462	51.6642	46.8064	46.6344	61.6267	55.9383	58.6684	47.116	62.7114	45.3902	59.6887	41.4258	55.0233	42.3432	61.1927	48.3581	45.3993	36.1917	55.1476	43.7454	50.3844	59.2878	42.1324	55.086	63.0703	56.944	45.3464	53.7991	62.2767	49.5855	57.8293	24.8646	51.948	43.8717	61.1951	54.1443	73.8178	35.5997	39.6996	42.8806	43.1064	44.9969	48.0023	48.5494	35.8905	30.2796	88.8745
CAPN10	1.9308	1.73121	2.32638	1.33708	2.39713	1.46894	2.028	1.70649	1.57286	2.08108	2.37184	1.72777	1.9524	1.82454	2.02166	2.00558	1.78199	2.11827	2.83757	1.37908	2.1114	1.7072	2.2833	1.55456	1.53487	1.83059	1.70905	1.67022	1.93506	1.73647	1.78734	1.87471	1.59227	1.02707	1.79355	1.99973	2.44202	2.87544	1.47176	1.47719	1.44767	3.14043	3.2578	2.53239	3.69553	5.67881	2.61378	4.99731	4.5149
CAPN2	64.6317	69.5011	57.0583	62.256	53.4911	25.1074	66.4754	71.4251	74.137	50.1213	61.5806	74.8314	80.1515	30.1005	43.0321	49.5694	62.7418	51.6056	62.7378	44.0683	66.262	63.8978	39.541	85.0172	43.6201	42.1397	85.1087	67.2302	45.6884	47.4693	72.4677	67.4373	64.8774	21.0828	46.6908	59.7312	63.11	62.333	65.1642	27.2688	46.4609	21.9618	22.7536	24.6838	55.8239	25.6309	40.2032	30.4795	19.6448
CAPNS1	140.619	137.045	113.19	127.831	120.966	148.579	133.001	132.362	134.517	130.474	125.956	108.028	134.047	108.721	131.964	153.003	146.773	104.377	107.824	119.922	133.368	113.378	135.295	143.511	87.8789	150.418	150.949	147.645	141.238	125.52	174.946	117.286	130.958	85.8173	126.336	121.348	154.9	123.644	136.968	121.751	133.444	130.446	144.493	89.9762	100.505	122.335	141.683	117.367	147.209
CASP1	10.6333	28.7525	6.88207	12.7078	10.7663	21.3924	6.92216	12.4056	11.5312	24.8863	11.1235	9.50845	7.6493	32.2979	13.4352	27.1914	20.6068	13.6505	4.55207	8.38103	10.3414	10.7798	15.3464	13.033	5.02097	12.582	14.6069	10.1401	19.917	6.0037	11.1318	4.97037	7.15889	3.55772	9.43186	16.8414	32.7941	11.6405	50.4973	78.4936	8.4164	20.2982	2.44672	11.5168	22.5457	3.09192	3.75922	23.6043	15.4287
CASP3	21.8724	26.1493	25.4924	23.8795	24.0707	19.836	25.2168	19.5178	25.9289	28.3506	22.5815	21.8389	25.5178	20.1051	20.7533	23.05	30.0792	20.7924	24.8463	15.9422	21.6318	28.3567	16.58	28.0903	11.4389	18.9388	26.7286	23.6805	34.6689	16.5464	21.8288	22.1549	20.9365	6.14542	16.2244	30.7109	33.1243	20.3661	46.1149	36.8089	18.3158	29.9232	31.6321	27.7223	25.0048	19.6796	24.8851	22.6474	14.9958
CASP4	2.98442	2.83277	5.9747	3.15744	4.9678	6.31046	2.79073	4.34476	3.28892	5.13912	3.68681	2.39685	3.35514	4.86688	3.33401	3.99915	4.2878	2.38138	4.58309	3.6593	3.98185	3.39378	2.4808	2.82453	1.9689	3.07449	2.34719	2.92446	5.54053	3.35072	3.98521	3.23119	2.98346	1.36059	2.99895	6.36493	4.89489	3.51218	3.11376	7.34985	3.60825	5.92453	6.60007	2.26732	5.40628	5.98799	2.77298	1.41008	5.37598
CASP8	3.52591	6.11832	4.84026	4.22356	5.0772	3.31566	5.45936	4.52807	4.99782	4.68311	4.98671	4.49808	4.44363	4.63215	3.84861	6.15397	5.89013	4.28558	4.36364	3.47241	4.67156	4.71269	4.0112	5.20994	4.30082	3.94463	5.02029	3.76135	4.63587	3.19428	4.0453	3.98435	4.25494	1.5614	3.68713	5.06392	6.13513	3.60444	9.86513	7.36966	3.45335	4.94243	5.58568	7.50645	5.45138	4.1425	8.34396	4.63858	5.44403
CCL2	5.70732	6.03309	6.77049	5.01527	9.10745	17.489	7.09858	4.77213	5.47812	10.0566	6.36804	1.98049	4.87367	15.4138	11.0701	16.1302	7.87583	7.53451	5.99671	18.2486	10.1827	12.1539	4.46942	3.92883	8.01531	13.8163	3.11502	5.18787	21.5031	19.448	6.93975	3.16388	4.21103	6.73827	12.2282	8.7117	7.1697	7.79433	5.39863	60.8608	9.41643	8.61174	8.25689	2.84437	3.66173	2.6801	2.43151	2.12371	4.56725
CCR2	1.03555	4.25496	2.31852	3.00004	2.26495	0.678699	2.06908	3.20097	2.53214	2.6004	3.88744	1.11077	1.81263	2.62007	2.62807	4.30336	3.58493	1.86703	3.44186	1.15153	1.74659	2.88467	0.490898	1.20026	1.22288	0.53225	1.16443	2.80759	2.39094	0.366209	1.97305	2.21476	1.56565	0.725765	3.33296	2.02816	4.77871	1.52409	3.65725	4.3463	3.55149	0.123826	0.310599	0.425067	0.480778	0.665395	0.293998	0.150359	0.67985
CD46	22.3228	26.4061	34.0032	30.8469	27.4399	26.5345	26.3309	23.519	27.0027	28.0073	26.6122	24.9432	30.4773	20.5468	31.6313	22.6853	22.1296	25.8803	30.6984	24.1722	25.8645	34.406	20.1826	19.2921	20.6732	25.3209	21.9722	29.9058	40.2726	23.3933	23.0781	27.6417	26.0322	12.3649	22.7441	30.1344	25.4675	24.47	23.3276	27.6972	24.4554	65.7926	82.2056	86.6946	36.333	28.0061	110.379	51.409	62.2553
CDKN1A	151.652	143.607	56.7289	77.7264	86.9894	178.798	136.112	118.39	115.934	87.609	81.764	150.54	124.725	49.8749	74.466	189.032	139.317	59.5738	96.3194	99.5764	105.94	115.432	80.517	166.007	90.4937	100.297	220.228	115.442	111.359	97.6202	147.056	89.1686	95.3965	28.2368	70.2018	91.9753	116.255	121.299	162.811	107.619	55.4023	232.72	23.7867	47.622	60.9761	19.3388	19.1432	78.8436	145.693
CDKN1B	23.3972	29.4759	35.4633	28.3937	26.2863	25.1657	25.7752	22.7668	25.3282	32.8265	31.2648	15.8552	27.0545	30.2779	29.2592	23.1814	24.092	26.521	26.0152	26.1743	20.2699	24.792	21.4655	18.394	25.117	14.6913	20.9735	22.8707	23.4314	17.1198	24.3499	25.7897	25.6751	35.7268	30.9275	30.0763	30.7028	25.6779	22.8851	31.7795	32.5512	33.0342	46.2709	39.5548	28.781	37.7932	33.0172	22.5007	33.2713
CDKN2A	0.303047	0.522729	0.785444	0.164073	0.365901	0.900943	0.248685	0.28712	0.290484	0.520647	0.386225	0.191568	0.166501	0.293281	0.150173	0.204709	0.334735	0.169743	0.306852	0.148125	0.281365	0.112642	0.260161	0.259737	0.207625	0.238201	0.274161	0.290974	0.175221	0.131912	0.321636	0.148767	0.253143	0.165944	0.186395	0.369219	0.386655	0.163662	0.158544	0.543338	0.223711	5.66516	0.985258	0.37241	0.667645	0.405293	0.287324	0.370452	2.05188
CFLAR	4.49002	4.59658	5.05942	4.67699	5.54299	4.84799	5.09863	4.59172	4.62531	3.60355	5.42523	6.15678	5.26524	6.31067	5.48179	5.11107	5.96096	5.22852	6.79897	5.03473	5.36753	5.49049	6.01497	5.71383	5.56965	4.88073	4.74061	4.30661	3.37252	5.94509	4.49639	5.71254	4.17297	3.3417	4.33029	3.93815	5.43893	6.3954	5.80556	3.89596	3.99924	2.13383	3.60902	4.22708	4.63084	4.36379	3.34995	4.16351	3.06657
CHMP2B	34.5164	33.1866	31.3404	39.2314	29.3236	32.8853	36.3221	31.7366	42.7836	35.1331	25.8868	43.5132	34.3547	20.264	27.1462	42.536	29.7006	20.7545	33.108	37.0846	33.3042	44.4691	21.3996	47.3574	33.2253	30.9077	41.7268	34.5598	53.6295	33.5115	29.658	28.1652	30.9862	16.408	29.3226	40.3646	33.5079	26.2321	42.5101	43.0258	31.9647	30.7979	30.5239	37.6003	16.2393	15.074	31.6716	27.6747	14.6773
CHMP4B	226.47	215.383	164.867	201.667	168.667	238.041	203.886	233.335	234.704	193.032	189.429	235.085	216.609	132.612	143.561	195.835	218.497	148.268	172.606	190.818	208.297	226.805	156.352	314.976	162.007	165.984	255.458	225.587	175.301	155.804	262.77	185.34	224.166	117.239	178.741	203.188	211.726	178.839	231.149	161.344	185.578	94.5763	310.483	177.403	105.029	111.216	170.114	187.688	204.723
CLN3	11.6042	8.40331	10.4812	7.78677	11.9621	5.77309	11.823	7.9373	8.47757	10.505	10.1717	8.19151	9.02229	7.81445	10.3693	11.011	11.1171	10.5961	14.9798	6.91614	10.4245	10.351	11.207	8.64894	6.59861	10.6981	9.77265	11.0044	7.86374	9.88609	10.8864	10.153	9.31979	2.71686	9.10296	12.0524	11.3192	14.6728	10.3044	6.75448	6.21832	8.43243	6.54999	7.63628	10.013	14.0035	9.51405	16.647	10.1524
CTSB	87.6573	113.181	112.316	85.6851	85.0704	95.4005	80.0119	82.9227	98.4162	112.621	100.234	75.1689	113.267	154.511	122.199	168.263	94.9158	73.3306	105.273	70.4011	103.677	67.7426	67.4557	93.9317	79.8301	74.544	60.1151	64.3615	121.881	69.882	103.107	106.361	95.8792	73.5392	93.3026	104.921	110.627	73.7387	114.612	140.378	93.3325	165.783	56.4447	39.9727	156.892	204.281	63.0355	90.6209	137.76
CTSD	490.076	351.484	363.383	312.596	349.449	420.633	336.585	399.335	327.796	341.647	437.186	376.564	377.287	238.477	331.195	324.992	378.311	287.142	372.302	247.283	407.064	293.027	257.103	429.051	235.535	299.433	453.56	338.662	270.633	156.675	453.576	401.341	451.835	83.3587	325.178	384.536	338.678	424.838	276.537	170.617	238.685	238.288	103.745	101.613	239.876	324.904	94.7331	152.546	264.153
CX3CL1	2.11376	2.79059	3.00084	2.22521	2.4829	2.77433	2.82757	5.19837	2.04512	2.0626	2.48641	2.61773	1.85625	6.28751	3.72729	3.01907	2.92062	2.94762	2.60303	5.17622	5.19731	2.27528	8.89831	1.68855	4.04033	18.4835	1.98865	1.98928	2.32854	4.48593	2.14169	4.37834	2.80848	4.40137	2.5668	2.16531	2.12698	3.43771	2.74074	5.51187	4.50993	0.339082	3.13876	0.98023	8.56288	1.78586	3.30795	5.05793	3.59769
CXCR4	7.44821	7.93118	14.3389	9.73697	52.4928	5.28865	13.792	41.4332	11.7786	11.9003	15.4308	26.1659	9.32597	8.02388	6.54599	22.8312	18.3874	13.1761	22.0893	26.6861	20.4895	23.7346	23.4146	8.29604	5.54099	11.8854	12.3607	4.92314	9.82269	27.7697	9.17316	26.1555	8.32473	3.78381	21.2072	11.7889	22.6818	25.4661	4.22037	7.67302	9.73011	70.4585	7.73636	3.99547	15.1546	27.0619	7.07318	6.1941	14.8559
DAPK1	3.04395	3.67569	3.98228	2.39229	3.36447	6.15443	2.84708	2.77825	4.17042	3.50005	3.42938	2.39682	3.86616	8.72404	2.84872	2.81121	3.38536	3.44245	5.90891	5.05813	2.98033	2.64609	3.30469	2.77149	5.96169	3.55219	1.72224	2.40414	1.97006	5.32521	2.08882	3.77153	2.92042	9.19667	5.53196	3.09156	2.81627	3.80122	1.50571	3.20931	6.47498	1.01486	0.609032	0.85084	7.23561	2.22655	0.620192	0.516738	1.25053
DAPK2	2.62147	3.5529	1.51579	2.5653	1.73449	6.85855	2.75807	2.92615	3.57177	1.38858	3.62034	3.24986	3.35112	1.15208	2.11009	3.23577	3.37369	1.85014	3.26414	1.71159	2.55945	3.54055	2.93792	3.56823	1.29976	2.44262	3.51598	3.42035	2.21229	1.61578	3.40667	2.59065	2.74005	0.38601	2.52031	2.66981	3.56605	2.53307	3.99147	1.11789	1.48917	0.847072	2.46565	2.31558	0.909251	2.58803	1.52922	3.03372	5.4276
DDIT3	7.25375	8.89134	11.9842	5.87131	8.09881	8.93891	6.26298	6.64939	5.56913	11.1754	6.9589	7.99166	7.91267	9.87997	6.30213	13.2551	6.78345	5.80424	9.47952	8.91074	7.71101	7.86395	6.31769	6.74188	9.37896	6.77434	11.402	7.09232	11.1243	6.53362	5.97723	7.46549	6.71223	7.18208	8.36797	9.70147	9.5991	12.1593	5.81691	12.4556	11.1579	6.3693	11.2355	6.84845	14.4895	19.7292	8.95795	20.0778	13.1787
DIRAS3	0.390088	0.38231	1.10974	0.343252	0.770284	0.653737	0.441713	0.300671	0.343743	0.610768	0.36939	0.408314	0.335502	0.786492	0.579118	0.468269	0.410427	0.575583	0.568797	0.962979	0.308674	0.247151	0.7353	0.250408	0.91111	0.586377	0.330849	0.458362	0.269119	0.429762	0.255691	0.529317	0.389773	1.27955	0.369395	0.3411	0.371887	0.58761	0.310257	0.693392	0.660108	0.052063	0.272845	0.128679	0.106323	0.149876	0.241044	0.292614	0.0952818
DLC1	2.47383	2.03566	1.4136	1.74229	1.24481	3.36643	1.83666	1.77647	1.37461	1.6166	1.90009	1.61728	1.36817	4.60898	4.8479	2.29081	1.65428	3.46126	1.82797	5.9352	2.17137	2.35205	2.67882	1.67759	4.56784	5.65817	1.27995	1.843	1.2725	3.93871	0.964147	2.57252	2.12237	8.28055	3.48224	0.979963	1.04546	2.1747	1.22561	2.66267	4.81105	1.19893	1.77125	2.00903	0.84638	1.40837	1.10202	1.01435	1.02225
DNAJB1	33.7357	40.7598	42.2372	45.069	34.4512	24.2202	37.2944	39.9998	37.0086	35.4972	33.0522	46.6077	37.632	30.0743	30.9502	34.968	38.418	35.5535	39.2441	37.0536	49.7219	33.0774	33.0518	34.1191	29.8302	48.7256	38.5918	38.7059	90.3268	52.3659	38.7316	34.2332	33.9012	21.654	35.1521	35.8763	34.5874	43.5764	34.7805	36.4592	32.6308	58.8991	62.7007	37.2183	40.3516	36.0128	44.9817	39.3148	59.4511
DNAJB9	10.4569	15.063	14.9814	15.1963	13.1208	12.3349	9.06513	14.7865	14.8216	15.8498	13.2753	9.24551	11.7907	10.2018	10.6451	17.8182	13.9186	10.5253	16.2427	11.1171	13.8587	20.5685	5.50392	10.9593	9.00428	11.4183	8.56038	11.2708	33.3946	11.2293	12.7747	14.0252	11.4188	7.27812	13.5513	13.9564	18.1688	7.56769	10.6708	25.5155	15.7498	38.5699	16.45	11.6964	9.84258	7.2823	14.5456	8.82961	13.8823
DRAM1	3.12594	5.37197	4.97925	3.43795	3.43098	1.71918	2.71041	4.0616	3.64725	3.2032	3.53326	2.67552	3.2411	9.13455	5.29732	5.62943	6.62235	3.75559	2.82724	3.19311	2.94394	3.67472	3.58028	4.13682	3.98365	3.96511	2.26437	2.59235	4.62135	2.06164	2.99308	3.34373	3.146	4.16881	4.33404	3.61584	5.06856	2.04936	6.2838	16.0371	5.68828	8.50268	6.41947	3.38006	11.0687	6.86676	2.4593	6.24594	7.99411
EDEM1	10.6587	10.3008	9.21271	10.1117	15.2003	9.39298	11.404	10.9914	11.4092	8.10667	13.1252	10.0555	12.0304	8.86111	9.05127	13.9976	11.8279	9.11709	15.1352	8.10743	14.2067	11.1481	6.104	10.0862	7.34997	9.49749	11.5471	8.87744	7.74842	8.86223	6.25261	10.2611	9.57294	3.26794	7.36426	9.81319	16.4657	10.8968	10.3535	6.77273	8.72176	9.10848	6.51658	10.9623	14.9825	13.9553	9.08894	6.83905	7.09347
EEF2	820.151	683.901	901.354	759.062	635.538	754.849	587.361	740.861	711.447	789.094	892.433	402.043	877.885	652.24	793.997	555.059	658.196	556.138	608.525	569.745	781.801	415.702	641.339	434.899	659.873	691.704	404.66	597.58	460.317	527.266	844.036	900.053	848.153	608.351	686.395	633.842	642.245	631.264	455.044	511.342	728.14	990.063	666.686	808.643	1333.15	1119.83	706.053	791.836	1778.25
EEF2K	7.14507	6.54385	8.36043	8.0283	7.26496	7.93025	6.24722	7.31051	8.79998	4.84155	8.09576	9.73473	10.1814	8.742	6.47742	5.28739	6.31588	8.24885	9.3239	10.2638	5.88957	8.26902	6.70249	12.1591	7.3554	4.44681	8.1984	10.1123	1.91051	9.06653	6.62993	10.0636	8.35903	8.85743	6.73771	5.32504	5.18337	8.83945	6.37672	6.2756	7.6533	4.08896	8.79307	5.47497	5.76315	5.12505	8.38401	3.99322	6.05345
EGFR	8.4956	9.63616	6.84668	10.3318	9.00403	4.82888	11.2792	8.79218	13.267	3.53132	8.92579	10.4623	11.6433	7.05105	10.5849	6.25105	8.88662	8.71205	9.05439	8.91269	11.3933	9.88852	8.30209	12.2755	10.7288	9.18815	10.4287	10.8026	3.33392	8.77175	6.40358	10.9556	10.0333	6.04138	7.26791	4.95227	6.76677	8.26911	9.65622	3.33693	6.76345	1.86245	5.55599	10.4092	5.1073	7.10762	6.92655	3.13908	3.68773
EIF2AK2	4.24568	5.74941	5.27493	5.85263	4.6501	5.44345	6.70943	4.6315	5.30982	4.44528	5.12314	5.59248	4.87685	7.33131	6.14102	6.31597	5.62818	5.93695	4.89664	5.7535	4.406	5.85369	7.55704	5.03661	6.11064	6.6332	4.96266	4.85839	3.78571	6.44997	3.76635	4.8512	4.95433	5.17273	4.85096	4.34453	5.58676	4.51034	7.23492	5.87473	4.98762	5.02472	9.66402	10.0675	10.7795	6.6971	9.10751	5.11098	5.46333
EIF2AK3	6.85641	7.98695	7.17213	8.17386	8.79607	3.10266	7.89631	7.74319	7.71209	5.19494	7.82627	6.71061	8.88441	5.53819	6.74672	6.67246	7.24314	6.82275	10.1912	4.97803	8.64953	7.2911	4.03976	6.68099	4.70098	7.09064	10.1861	6.81447	5.86276	6.57279	5.29544	7.31591	6.31888	1.49196	6.15042	8.26685	8.10581	7.70438	7.667	5.17654	4.85495	5.60009	5.93633	6.53165	6.72142	6.43577	5.60798	3.78935	3.85738
EIF2S1	7.81579	9.89038	9.18955	9.94993	9.87117	7.2251	9.68262	8.15319	9.78624	11.6021	8.61439	8.01688	9.0977	12.2029	10.3084	14.8244	8.89951	10.5563	10.0228	11.2002	9.05593	10.3405	9.06302	6.43349	11.5272	14.1663	6.83365	9.84204	18.3268	15.4886	7.8524	9.6654	7.66504	9.35623	11.1099	8.99146	9.64072	8.13419	10.9046	16.6577	11.4349	27.2615	19.133	32.8306	14.5394	14.3483	24.665	16.3263	11.6018
EIF4EBP1	24.8603	18.264	36.922	15.7328	26.8513	9.28744	23.2833	16.0989	20.0681	39.8063	19.9172	12.4323	19.9879	28.4634	27.1173	24.5132	21.9255	21.0635	25.6776	13.0146	18.0123	12.6868	29.834	9.33587	14.7032	24.1895	10.4112	15.4267	31.5524	23.9167	21.4768	13.6261	16.4125	12.1275	20.3042	37.2925	19.04	23.8906	19.1374	29.9734	19.7941	116.745	36.5662	50.6466	49.2451	64.1015	99.9984	59.7534	59.6998
EIF4G1	46.0505	50.0664	35.9478	47.1813	52.9855	31.1527	55.0954	42.0412	50.1242	28.4371	53.7924	40.5675	42.9414	53.5519	53.7533	66.2334	50.153	57.9481	43.1511	34.99	53.1247	41.1919	47.7138	35.4758	56.4267	63.6727	39.7597	48.3572	26.7725	74.7194	31.2353	43.6376	40.6002	39.2799	45.6148	25.2836	45.4391	50.1701	54.5593	26.2538	34.3532	50.0912	64.85	81.0817	57.544	80.151	50.0653	47.8853	46.753
ERBB2	35.4956	47.4145	32.7747	43.2818	29.0332	42.2967	38.761	45.9025	44.5071	25.0464	46.4203	36.6054	44.8608	15.6112	37.3634	17.4995	41.1103	26.375	29.9638	25.9516	41.1107	34.1079	34.7504	43.3214	15.8542	30.2337	34.3111	47.1986	19.4636	18.6609	49.7587	41.3531	50.7341	9.50774	30.3165	30.4892	36.4987	43.2698	35.9418	10.739	21.4618	17.4593	19.7358	19.1821	45.0742	42.3879	33.7794	25.3644	17.1534
ERN1	1.86608	2.46747	2.55598	2.81127	3.99771	2.10736	2.20524	2.82773	2.28378	1.62889	3.40552	2.72405	2.84882	2.07542	2.38634	1.97158	3.23452	2.18696	4.7918	1.88002	3.52011	2.93996	1.87303	1.81905	1.82666	2.66228	1.93365	2.25796	1.38477	2.78268	1.69955	3.06811	2.48637	1.01831	2.36476	1.63126	2.88092	2.89712	1.75866	1.11787	1.76134	1.52936	2.9826	2.91298	3.08733	3.13016	2.58951	2.06808	1.97699
FADD	7.10697	8.13928	6.22637	7.60848	6.10415	6.67248	6.83158	8.05572	9.02555	7.44259	9.81537	5.84312	7.75046	6.29609	6.51673	6.99509	8.55402	5.51539	6.45657	4.0378	9.7685	4.70147	5.6302	7.27354	4.52245	7.62302	6.81743	6.72805	7.07302	5.9217	10.1499	6.47633	6.21357	3.38922	5.52819	7.79854	7.8714	4.73473	7.84908	6.98783	6.16741	10.8105	6.50047	8.33638	6.41897	6.0715	10.3927	4.32064	12.8663
FAS	9.70402	8.84975	22.3156	8.59488	9.55921	3.65557	12.2972	7.84347	8.52815	12.6221	7.50357	7.04146	7.24726	6.63647	8.8885	10.0563	9.84596	10.6626	12.6251	9.55645	9.30578	9.86144	8.60754	7.23399	5.01534	6.23989	7.3856	6.92728	11.0105	10.1913	7.82434	9.19841	6.22432	3.40597	7.17777	16.142	11.2221	15.3861	15.3205	20.0053	7.62428	18.9049	4.03092	4.37826	6.40853	7.36589	2.76754	6.54433	4.48569
FKBP1A	95.0006	67.0404	94.2897	82.8076	97.2828	54.9433	105.023	82.9868	77.9989	104.798	73.2981	89.2419	76.2038	62.5236	76.6977	101.577	79.0125	93.8989	90.758	84.5838	79.8298	79.19	76.5254	85.5587	71.5002	76.73	109.485	66.6392	70.3585	82.1646	76.8796	71.5951	84.743	47.2303	74.6027	115.462	82.7123	84.2036	78.7117	93.9182	72.7504	70.543	170.547	52.9935	55.9509	54.7882	87.419	60.7995	66.3111
FKBP1B	4.85017	3.14853	3.88612	2.03889	2.42516	2.14256	2.7818	4.30385	2.81406	5.25622	3.05491	2.57147	3.39459	1.37395	2.84281	1.54033	5.92151	1.27469	2.7314	1.91185	2.02941	3.63468	3.66522	5.96324	1.83356	1.43974	3.46782	2.31114	4.96037	1.36207	3.21278	3.16562	3.32463	1.13823	1.52108	3.87929	3.82837	5.37699	3.73868	3.39193	2.50908	0.260323	0.518545	1.00676	2.11262	0.329148	0.152702	1.34836	0.168149
FOS	141.043	62.7536	14.383	185.064	74.6141	52.5287	193.132	89.7495	249.309	118.374	47.2401	108.79	54.5874	129.821	199.227	227.652	230.736	148.595	72.5138	157.716	96.7744	213.884	277.477	37.2033	135.92	74.1621	332.558	89.9919	100.583	103.88	253.629	112.546	70.5312	7.51142	443.789	66.6564	77.8658	433.647	30.4196	132.095	126.989	167.103	116.498	40.6034	366.75	30.3193	58.3884	93.2595	23.8037
FOXO1	7.83538	8.10283	6.85311	7.69189	9.52939	5.13156	7.78101	9.3336	8.87488	5.24577	7.94562	8.88891	8.8472	6.19444	7.47522	8.9197	8.05306	8.83636	9.40785	8.53771	9.04702	7.0908	7.39111	7.23262	8.15295	13.8109	9.40019	6.80868	4.24234	9.21955	5.85476	8.47971	7.81792	5.73255	6.73237	5.68449	9.90796	8.34249	7.98678	4.96874	7.94784	1.33902	1.69956	11.7942	3.57387	4.30504	4.6083	5.17452	2.3697
FOXO3	10.6637	9.34671	7.85348	10.2582	11.5523	8.01262	11.0063	11.7718	9.25605	5.19378	10.7469	13.6255	11.7359	8.59941	10.2085	5.29434	8.61114	9.54884	10.3732	8.38813	11.4906	12.8681	9.94119	9.11505	10.3514	7.99369	12.109	10.6859	3.15031	11.2308	7.64722	12.0697	11.6409	8.54649	9.40231	6.3012	8.97448	9.84913	8.68741	3.49712	9.48512	2.74063	16.0682	15.1291	7.19084	6.55164	10.0069	5.71811	6.47657
GAA	21.4849	15.9237	27.2278	16.3994	22.1898	13.0887	14.987	15.2174	14.6691	17.6067	17.673	12.5916	20.9065	32.2255	18.2252	12.3494	19.0118	14.7699	26.4164	13.8508	26.3819	14.3912	18.8333	11.6274	20.7995	22.2481	8.35004	10.1605	9.06234	15.2539	24.6838	23.9278	29.2783	9.06422	11.6818	20.5306	23.8675	26.433	12.4624	12.4102	14.8126	11.8539	12.814	4.67538	9.07289	10.6789	46.6513	10.9888	7.88461
GABARAP	28.8778	25.6891	37.8655	27.2772	28.5182	31.3945	23.9356	29.5577	24.904	41.1746	27.272	23.5792	26.4661	30.4942	25.803	28.9481	25.6827	22.4932	27.3095	26.4325	27.8642	23.7072	23.9157	31.2233	20.9077	24.6288	28.7021	25.706	38.9977	18.2667	36.2886	27.8061	33.2247	22.5448	29.9232	36.6541	29.0207	23.9993	23.6577	37.9929	33.1589	27.482	13.5138	12.1732	24.6558	21.8799	5.0209	14.0199	10.1213
GABARAPL1	9.53364	9.72018	12.3941	9.26557	8.47093	18.3577	9.16725	10.6261	9.05298	9.98906	9.51113	10.2814	9.19818	14.253	10.0284	8.2231	8.90255	8.37608	9.938	17.7976	8.38619	10.3131	11.3804	11.3576	13.181	11.1349	10.8707	9.68312	8.47762	10.4352	8.63268	12.4899	10.6009	17.3402	10.7212	7.91276	9.38267	10.5771	7.31816	13.1636	16.0026	1.74091	9.16665	3.18132	7.70099	7.14535	1.57578	3.15557	4.22129
GABARAPL2	24.2315	23.781	32.8058	23.7479	22.3224	24.642	21.2617	25.7535	22.7075	38.2249	22.5941	20.3674	24.7217	18.9703	19.3299	25.2125	22.4125	17.4453	25.4165	28.0312	22.6943	24.1082	18.7238	27.2559	19.8017	18.6846	27.6223	25.0965	44.8768	19.4947	26.0719	24.3129	23.5091	17.5415	24.013	36.0821	25.9144	20.4293	21.5149	37.5363	27.8473	34.5504	22.2198	12.9536	16.4403	19.5967	30.5904	21.2222	20.0755
GAPDH	749.311	692.474	685.599	746.034	670.289	607.758	765.772	587.353	686.453	778.075	659.279	525.518	693.521	721.927	671.313	1067.71	653.177	673.842	561.023	554.842	680.632	505.527	703.025	471.126	533.694	668.34	556.415	609.721	709.955	822.838	764.424	699.528	663.878	542.205	648.458	749.993	725.496	694.631	825.163	788.325	702.297	2008.63	731.585	679.768	1114.59	988.406	1004.14	3208.05	1612.9
GNAI3	3.20949	4.07456	3.28457	4.19969	3.525	2.62868	3.40834	3.63583	3.92099	3.70449	3.47555	3.6456	3.90618	3.70831	3.51169	5.0069	3.67083	3.14251	3.00213	3.91891	3.76911	4.25887	3.4196	3.21932	3.24146	4.45645	3.60871	3.8462	4.75093	4.21373	3.43225	3.48896	3.29694	2.74632	3.35446	3.52192	3.74221	2.92723	4.86643	4.38704	3.92886	4.01824	5.25886	4.564	4.26213	3.70565	7.09746	2.78376	2.95919
GOPC	8.8559	10.3025	11.5764	11.6493	11.9649	5.62906	9.81098	8.77171	11.5211	8.79533	9.93278	9.7737	12.3321	7.82617	11.4992	8.53761	9.09632	8.90954	13.0716	11.5359	10.881	10.8827	8.68537	7.64954	7.50983	11.6894	10.5989	8.72391	7.92185	11.3856	7.9291	9.96895	7.90737	6.90989	9.62522	9.79848	10.6295	10.9554	8.65476	7.40485	9.55658	11.8996	11.3378	13.781	9.41451	12.2232	11.5203	5.51738	5.5617
GRID1	0.312724	0.254443	0.321499	0.325957	0.42962	0.310778	0.340093	0.323986	0.431338	0.248412	0.488073	0.291732	0.396961	0.4481	0.561528	0.263951	0.370199	0.225338	0.374696	0.288406	0.305132	0.260442	0.627814	0.206885	0.363032	0.644775	0.180158	0.375876	0.238813	0.405689	0.302908	0.487325	0.434512	0.533113	0.706812	0.255393	0.247507	0.430912	0.156431	0.323847	0.523816	0.1386	0.171114	0.0663721	0.106144	0.146298	0.0987232	0.116307	0.277436
GRID2	0.0139786	0.00386407	0.0137235	0.00220004	0.0142549	0.0143161	0.00682801	0.00752497	0.0037638	0.0059445	0.00285502	0.0094676	0.00391846	0.0532356	0.0131193	0.00251132	0.0141914	0.00889738	0.00305045	0.0253058	0.00715723	0	0.0177972	0.0113455	0.0126014	0.00669965	0.0059279	0.0107546	0.0067353	0.00921924	0	0.00231829	0.0102427	0.0574084	0.024268	0.00373485	0.00305397	0.00571911	0	0.0223772	0.0355831	0.0102611	0	0	0	0.0183798	0.00487255	0	0
HDAC1	56.4746	67.891	69.5032	69.4229	85.4372	33.6122	83.4232	60.4963	71.5627	66.4063	62.4079	69.3668	70.825	58.3542	60.4421	93.1854	67.5966	57.2272	70.4422	53.1741	63.8881	62.907	51.3561	63.6016	49.2396	63.6092	64.1601	68.7935	78.0924	76.1172	62.2483	60.36	58.0453	20.4834	61.8118	70.5453	83.5761	62.908	76.8478	64.3603	51.3518	65.629	68.9741	80.9283	53.4098	73.0842	39.4263	86.5457	59.8412
HDAC6	4.67201	4.78973	5.58128	4.6768	5.95777	4.11749	4.89079	4.37215	4.58537	4.42369	5.6965	3.66155	5.52681	3.99684	5.96184	3.70146	5.6672	4.50818	6.3724	3.69061	5.78206	3.93791	5.49086	3.18082	3.65743	5.40354	3.68324	4.5584	3.01848	4.95602	4.60678	6.21704	4.86916	2.15066	4.24486	3.81891	5.49446	7.46031	4.63028	2.54026	3.32279	2.50092	9.30442	4.12452	5.53159	7.4674	4.71168	5.26913	4.59506
HGS	10.4328	8.60958	9.30308	7.57656	9.79494	9.19182	9.4509	8.99928	8.90827	8.65697	10.001	8.12965	10.7517	7.63392	9.81897	9.51658	10.3218	7.81267	11.2322	6.39342	10.6705	6.22287	9.05641	8.90416	8.02376	10.0584	8.40993	7.87301	5.99178	7.92687	9.94533	9.78887	8.48541	5.50297	8.33159	8.56797	8.89777	11.2784	8.27699	5.11194	6.32371	7.20871	8.21267	11.8206	11.4876	15.6295	15.5613	8.52554	12.743
HIF1A	15.1624	22.3767	21.0683	20.0742	24.9831	13.5277	20.21	19.5701	19.1161	17.5371	20.7155	17.9811	19.359	29.8422	31.3456	39.4999	23.8044	20.9012	22.4226	19.5077	23.17	27.4376	19.7447	11.4601	19.1758	28.7392	16.5867	17.1868	23.1638	33.4366	15.0824	21.4437	16.96	13.9502	18.4796	15.074	23.1339	18.3102	22.8782	23.8287	21.6926	17.0951	17.3645	28.4221	20.7879	18.0641	14.6091	19.0288	13.1021
HSP90AB1	186.565	235.27	299.513	334.605	304.859	154.73	243.318	256.082	251.549	213.242	233.675	160.572	222.554	259.003	207.722	304.711	201.621	242.593	180.986	254.573	249.328	208.047	225.555	141.533	304.313	273.204	155.808	213.997	221.119	366.304	209.26	232.442	203.836	218.135	283.482	188.789	185.488	222.238	230.507	197.26	261.375	517.143	834.242	861.229	376.203	419.365	701.119	876.964	519.53
HSPA5	124.274	161.333	105.323	150.221	170.82	70.8187	139.867	121.683	140.548	88.012	139.643	105.727	105.183	180.667	131.977	317.273	149.387	164.109	137.165	107.942	155.453	155.493	108.173	104.546	146.19	182.721	98.09	115.415	169.453	209.279	106.255	98.867	101.096	82.5091	150.8	74.9895	131.303	115.336	219.781	194.502	131.725	420.501	221.644	205.001	295.488	246.471	196.545	153.655	148.978
HSPA8	167.347	227.278	216.075	297.766	256.125	177.788	191.583	220.773	228.752	191.567	191.226	153.341	198.267	209.731	134.069	255.664	203.667	197.397	218.807	175.753	269.953	182.371	146.813	145.682	289.644	237.853	120.649	211.397	540.206	275.031	208.741	156.451	148.265	128.038	201.679	184.405	144.115	185.159	183.408	249.614	211.132	639.385	383.344	387.418	288.285	224.518	462.046	194.969	391.78
HSPB8	31.7667	15.7737	20.6522	2.264	3.91431	12.9605	7.37303	4.66203	3.73982	60.8062	2.25597	6.25495	2.04704	75.9926	11.2827	25.6982	4.22471	35.0825	3.20319	78.4729	3.08766	13.64	30.2817	21.1704	107.811	11.5991	5.70598	7.34048	54.2818	51.3751	1.84152	15.3243	13.478	270.777	48.6636	2.34331	1.85999	9.95406	4.55309	79.0862	140.795	0.84403	6.2983	0.501554	0.70903	0.778895	1.65008	0.661661	1.39679
IFNG	0.086167	0.142913	0.0422972	0.0813692	0.0527222	0.0126068	0.0701487	0.150753	0.104404	0.366431	0.0351978	0	0.0362313	0.579097	0.0646962	0.0309606	1.34717	0.201099	0.0376072	0.0389975	0.0294124	0.0667254	0.0783611	0.293731	0.0388389	0	0.048721	0.132587	0.0415178	0.0568293	0.0828372	0	0.0789225	0	0.0641112	0.161157	0.903613	0	0.258903	1.30055	0.164506	0.16867	0.050997	0.0521108	1.26301	0.501743	0.0300354	0.0526663	0.270102
IKBKB	2.71629	2.70875	4.36235	2.66184	4.52187	2.57342	3.02912	3.1507	2.83579	3.18857	4.06979	2.9181	3.70369	4.09652	3.7018	2.96295	3.37785	3.547	5.19613	2.95737	3.58978	2.8932	3.75847	2.23458	2.98	3.45116	2.62545	2.58032	3.1485	3.08098	2.99169	3.68548	2.84092	2.54381	3.06584	3.03445	3.67709	4.77031	2.50553	2.91839	3.16041	4.46686	3.14848	4.96907	3.76521	5.65667	4.08742	3.61961	3.42878
IKBKE	8.82669	9.41284	6.59093	6.02593	8.06295	2.86363	7.82516	9.67953	6.04529	7.55235	9.11473	4.42509	8.85077	4.00642	7.31669	7.9379	9.53348	6.32597	8.06522	4.97417	7.80557	6.74225	7.08968	6.26	4.26139	5.79835	4.96214	6.31735	4.58866	3.91645	9.81544	7.69047	6.96805	1.13696	5.4585	9.2164	9.7136	9.09525	7.32003	5.75495	3.97283	7.10588	3.06393	6.18135	8.17114	8.9858	8.07704	4.90286	8.72762
IL24	0.371228	0.505758	1.15844	0.801275	3.13669	0.372432	0.621704	3.88259	0.956708	0.902098	2.16629	1.16136	0.735866	0.510858	0.318545	0.914643	0.990653	1.48523	0.763813	2.94018	1.33957	0.513337	0.906692	0.576775	0.167327	0.67356	0.899579	0.448812	0.370513	0.682037	0.662781	0.985063	0.534312	0.114085	1.45995	0.779317	2.06235	0.878743	0.412422	0.472988	0.539985	0.480123	0.868366	0.731247	0.60067	1.12564	0.517598	0.486212	0.522461
IRGM	0.0308092	0.00638737	0.0226852	0.00727342	0.0188509	0	0	0.0373167	0.0248865	0.029479	0.0188775	0.0208668	0.0259091	0.0103529	0.0173492	0.016605	0.0469172	0.00980501	0.0504245	0.0104577	0.00788735	0.0178933	0.0504327	0	0.0416608	0.0442985	0.00653261	0.014222	0.0668014	0.0304791	0	0.00766434	0.025397	0.0180756	0.0114615	0.0123475	0.020193	0.00945378	0.0163361	0.0317056	0.0147048	0	0.00911703	0	0.0102635	0.0260418	0	0.00706159	0
ITGA3	27.1569	28.7747	17.7648	23.9916	19.2804	28.2287	22.9249	23.8783	24.4545	15.3605	28.7439	20.9289	22.2975	14.9171	27.2025	20.567	25.46	19.8887	19.7555	15.1626	23.1257	22.2373	23.7801	27.5116	15.6825	20.2908	26.6653	24.7656	10.0523	15.4191	23.436	22.827	26.3944	8.85949	15.4497	17.382	23.8789	28.334	25.686	10.1494	13.6584	8.09019	4.81816	8.21069	14.4007	19.8866	22.4007	6.59995	13.0656
ITGA6	32.9114	49.6343	31.8114	42.2847	34.9698	36.7929	40.5692	31.7036	55.8467	24.8263	38.6186	41.1829	46.5727	36.1038	48.8082	52.256	42.3423	40.9453	45.0414	26.0942	46.1746	49.4496	34.0168	29.1337	49.7822	85.9267	27.3367	43.9335	37.0654	45.9432	28.2007	36.3221	37.0885	9.81474	32.8024	29.6895	38.6564	34.6477	53.8828	24.9783	29.1622	86.4938	70.2942	127.83	78.4592	61.214	138.941	36.6985	72.5864
ITGB1	47.8168	49.3667	46.1699	45.4924	43.3552	41.4185	46.8242	39.0553	48.2455	54.3542	39.4226	43.3402	43.8678	65.8756	53.7415	51.5211	37.4472	79.8336	46.1104	59.992	38.4019	47.1661	41.4961	46.461	80.1586	54.075	42.2657	43.3158	59.6375	66.2615	34.9266	47.6362	42.98	176.638	55.4012	39.8483	35.7956	45.8143	46.8015	69.1844	99.0396	54.1755	54.5089	51.0724	29.3419	31.1594	46.972	32.5967	29.0384
ITGB4	68.7024	59.7993	41.9817	56.7635	51.2351	39.6651	69.829	50.2156	61.1608	33.221	64.3064	44.5638	68.0906	52.3433	78.7125	61.978	65.5274	49.1551	52.2723	36.4374	59.1306	38.9769	49.5246	58.6332	43.3246	51.655	55.6405	48.4663	15.5161	52.1746	46.9185	63.3155	64.524	15.5067	40.5201	41.0395	55.9613	64.6118	51.1356	14.4376	33.2268	56.1004	32.2408	48.8879	91.7648	81.2717	107.103	54.5007	70.5071
ITPR1	1.69697	1.84935	2.05553	1.44748	2.81861	1.64446	1.32121	1.98146	1.4332	1.56616	2.12111	1.44793	1.41566	5.8163	2.70713	2.23423	1.7732	3.62802	1.64112	3.74061	1.5516	1.70484	2.65274	1.30663	4.82046	2.07913	1.03889	1.5429	1.4	3.77626	0.671334	2.05845	1.84726	9.48808	2.78761	0.821992	1.627	1.65829	1.16376	3.38938	5.92791	0.677101	1.11271	1.28566	0.665178	0.845416	0.544704	0.527308	0.605012
KIF5B	36.3678	38.4869	39.0089	38.1062	44.0451	30.2633	39.3404	33.6033	36.3486	33.2855	30.6012	36.5674	34.646	46.0065	44.6158	37.0908	31.7635	50.517	36.1254	46.5412	37.7567	46.3816	33.1723	32.432	49.3584	54.5633	32.8619	32.2322	31.5054	56.2625	25.3055	37.3052	31.8855	53.9996	38.9042	30.9279	28.126	37.379	37.1813	44.7719	44.5774	41.1397	102.928	73.2384	35.8648	35.0465	41.3513	71.8562	25.5421
KLHL24	4.45487	5.49373	7.45671	6.15651	6.52549	7.76273	4.62864	5.84569	5.90163	5.46669	6.55454	4.89224	7.75968	5.31927	6.04209	2.53507	4.12893	5.51402	6.2248	5.87284	4.52878	6.89163	5.22789	4.70519	4.59386	2.56738	4.68563	5.59896	3.30012	2.92876	5.87178	7.19772	6.5678	6.51101	5.71136	5.5499	4.85621	5.34877	3.84503	3.97891	6.38939	2.52347	7.06595	4.49066	4.8961	5.40815	7.03326	4.74988	2.91766
LAMP1	63.8779	56.3294	42.8554	58.4359	55.3648	74.2174	64.2558	61.4197	61.1752	36.2634	59.1371	54.209	59.0805	56.7197	59.7007	56.9132	54.9621	54.5292	50.6065	57.1949	57.5037	49.7343	49.8789	57.53	50.7884	58.7853	59.8799	64.1573	27.0114	50.825	52.4925	59.6811	57.8374	42.7771	52.8973	41.2581	48.9867	53.8029	58.8746	32.3612	51.8872	43.4579	92.8305	84.4134	44.9881	50.7526	49.7209	84.2781	56.9312
LAMP2	20.5212	22.3807	26.2484	24.9712	22.0715	31.3214	20.5918	23.5202	23.6715	21.4838	22.894	21.709	23.5129	23.0646	25.0189	21.0455	19.0346	18.7816	20.3125	21.7596	21.199	26.6199	16.3771	21.1614	19.3341	23.2753	19.4532	25.0389	28.1303	17.5926	20.2266	24.9022	22.9934	15.0315	22.2515	21.8606	20.9582	18.3808	20.9094	21.2865	23.4174	22.2087	87.5475	32.2133	18.1456	15.4505	33.8755	23.8841	17.571
MAP1LC3A	16.3205	11.2786	19.619	12.6931	13.5453	16.4531	11.4342	16.0162	12.7741	19.1114	14.0754	9.81657	13.7164	11.0084	14.1433	8.25039	11.5378	11.9803	13.4271	13.7078	17.2616	13.3992	17.3337	11.2545	11.8667	17.0858	9.93528	12.648	14.9668	10.1942	18.1979	15.2819	15.0247	13.5706	15.3043	14.5776	14.9651	16.7297	6.77977	13.8531	14.2335	18.9175	13.1256	10.2303	9.51118	16.346	16.859	18.6217	31.3674
MAP1LC3B	18.7495	19.1744	16.7654	15.9304	14.0768	14.3291	16.1748	16.3654	14.9484	20.2239	14.4033	17.2099	16.0638	13.7094	13.3929	17.109	15.9713	13.1684	17.3765	20.0751	15.5252	20.4976	13.5055	22.7857	14.2015	13.0747	23.1455	17.1947	20.968	13.0867	15.3366	16.934	14.829	12.6247	15.9957	19.565	20.6764	16.98	17.6942	18.5486	17.505	22.9878	26.0904	9.8868	10.1779	10.9273	16.9317	17.5672	18.7708
MAP1LC3C	0.0887913	0.122722	1.15501	0.139746	0.108656	0.207852	0.0289141	0.310688	0.262982	0.453109	0.181349	0.120275	0.0746695	0.437605	0.0833333	0.223325	0.396629	0.150708	0.0387526	0.502315	0.151541	0.103136	0.419888	0.158545	0.160087	0.553226	0.0627561	0.286912	0.513387	0.322081	0.017072	0.397593	0.178918	0.416749	0.264255	0.0711707	0.155189	0.0544912	0.0313869	0.203055	0.565054	0.0869038	0.175167	0.0322188	0.0197194	0	0.0619004	0.0271352	0.159045
MAP2K7	8.22068	6.71577	9.51256	7.19791	9.20278	6.97468	7.04453	7.95302	6.88751	9.18216	8.82833	6.93097	8.71157	9.60104	8.63047	6.43159	7.4926	8.23171	9.25905	7.16407	8.69323	6.43695	9.00826	6.93707	8.44057	8.58392	6.41576	6.62284	6.3002	6.96889	9.24828	8.83311	7.98168	9.84156	9.58196	8.13714	7.32664	10.1401	5.82267	6.41429	8.8014	7.3172	7.32011	9.00313	10.0391	13.0122	6.58425	7.50881	7.81926
MAPK1	13.9244	14.8423	13.7771	15.9191	14.464	10.3175	14.6477	13.8826	15.8842	12.7425	13.6959	12.9612	16.0919	12.3903	14.0138	13.6306	13.892	14.74	13.789	13.2218	13.717	13.8189	11.6695	13.3574	13.7669	14.2148	12.5505	15.4339	10.9203	14.2194	11.7629	14.5237	13.9222	12.7773	13.7401	11.2897	13.6471	12.2689	15.9937	10.762	14.703	12.4821	13.2035	22.2608	12.7645	14.7157	19.7147	14.3265	9.00072
MAPK3	96.2126	83.3337	59.4514	75.3684	58.4749	84.1744	78.4689	82.7251	76.9736	68.2059	81.3776	80.1562	76.6125	45.7347	59.8785	92.0292	78.5773	51.1617	76.867	57.7975	75.3981	62.1442	60.3775	104.939	42.3612	64.6002	111.588	89.3855	63.8414	57.2006	103.563	75.681	87.6703	23.3275	56.4851	73.5232	78.7929	72.8993	84.2089	46.3799	56.2585	29.3196	35.6422	21.1155	33.5744	47.2396	36.9321	51.3801	69.9138
MAPK8	2.81934	3.14398	3.1326	3.31765	3.20111	4.49217	2.8856	2.60954	3.35147	3.45314	2.97189	3.00454	3.6557	2.60288	2.91541	2.8491	2.71988	2.6802	3.61298	3.01894	3.48049	4.1695	2.61878	2.30183	3.14668	3.31457	2.86265	3.14629	5.02588	2.91673	2.8019	3.52489	2.68547	2.22109	2.90594	3.22085	3.0623	3.06134	2.89928	3.17306	3.26005	3.79774	3.90701	2.90955	3.49298	3.71998	3.6283	3.36759	2.34281
MAPK8IP1	1.54517	1.20259	1.9809	0.684706	1.43191	1.79976	1.20175	1.08618	1.06232	1.42264	1.09077	0.961859	0.845251	3.17921	1.69517	1.77877	1.58392	1.66781	1.58447	2.68183	1.08047	0.81318	2.76127	1.34908	3.18483	1.97005	1.12815	0.807915	1.01918	1.73144	0.646102	1.49277	1.33556	4.52979	2.45558	0.841718	0.766928	1.28891	0.59923	2.23681	3.18863	0.535919	1.31402	0.997971	1.63252	5.79349	0.888955	1.65045	2.08252
MAPK9	5.8443	6.70616	6.90934	6.24749	7.13507	5.00689	6.72652	5.26016	5.2052	6.24987	5.6491	5.42679	5.92338	5.37177	5.44692	5.64492	5.63026	6.1443	6.9335	5.85846	5.47866	5.68583	5.04984	5.33064	6.08029	5.45419	5.28315	5.95649	5.88697	6.32663	5.20534	5.57449	5.98772	5.9317	6.197	5.16986	5.9813	6.09682	6.18321	6.13496	6.09719	5.78124	6.88078	5.56248	6.55132	7.29988	8.39104	8.36854	5.13275
MBTPS2	1.45586	1.40881	1.69957	1.52468	1.75519	1.32617	1.69217	1.34488	1.4324	1.50487	1.46953	1.14928	1.36932	2.29662	1.95742	1.89881	1.25562	1.85581	1.47007	1.97668	1.45874	1.64327	1.41129	0.874052	1.9342	1.81437	0.940621	1.19938	1.22074	2.12066	1.15284	1.77235	1.37617	2.90618	1.67657	1.26275	1.1995	1.61376	1.1761	1.61047	2.42408	2.60627	9.51626	4.60159	2.32117	1.72911	5.28236	1.55932	1.9374
MLST8	10.2087	7.83839	9.26561	8.01634	9.96731	6.95115	7.67646	7.8839	8.45862	12.7142	9.97148	5.66732	9.32001	9.61556	9.71556	10.8515	9.92288	7.63358	9.0753	7.18032	9.7827	6.45773	10.2266	5.96647	6.37419	9.43652	6.37623	7.55715	14.0488	8.73031	11.3336	8.12106	9.24142	4.67661	8.9413	11.9417	8.4864	9.75391	7.5091	10.7042	7.44679	23.2742	15.0341	10.7708	13.4793	16.5306	10.0618	13.8816	19.4927
MTMR14	9.11496	7.8673	7.79188	7.67179	9.96302	6.85876	7.98208	8.39719	8.778	8.71867	9.22579	6.61235	9.30975	6.79564	7.82437	7.95543	9.44074	6.29177	9.15351	6.33187	9.80409	6.80412	8.10163	7.82768	5.63033	8.8152	7.62232	7.89212	8.20271	5.57366	9.52643	9.22041	8.27145	3.52878	7.44554	8.64993	9.82298	9.04074	8.47059	6.36309	6.49588	6.53093	6.1564	6.76461	7.73976	7.65295	8.79332	7.44569	7.01063
MTOR	5.42698	6.34618	4.91204	6.25198	7.99052	4.61956	6.97404	5.06281	6.63968	3.81349	7.37568	4.75684	6.63578	6.92206	8.04157	5.95724	6.09806	7.74087	6.25721	5.13634	6.12789	5.05306	6.24531	4.38456	7.15306	6.64094	4.57712	5.87651	3.49462	7.74198	4.29258	6.67992	5.73323	6.88453	5.95154	3.18845	5.82926	7.67617	6.96128	3.60244	5.46429	4.82918	5.83437	7.4307	6.78536	6.36191	3.32354	5.47972	4.72731
MYC	31.5857	19.9194	25.0552	24.0696	23.4951	9.89559	41.3454	27.5522	17.5098	28.6883	23.5211	15.3961	23.0133	20.7379	49.1614	26.5578	23.1276	32.3879	28.2145	33.1353	36.66	28.2595	34.9717	10.1219	17.4815	39.1546	9.42732	16.2029	27.2137	45.9685	25.1147	36.1338	20.5516	8.38503	29.8888	28.2188	20.255	43.0392	13.9323	18.4427	18.1273	245.651	122.683	240.699	119.182	159.003	189.974	47.9076	96.3916
NAF1	1.72445	1.82528	2.16444	2.17124	2.18593	0.897414	1.86236	1.70092	1.99832	1.83334	2.1801	1.68541	2.20587	1.90223	2.06915	1.62354	1.764	2.25543	2.40556	1.97583	2.57431	1.5044	1.93746	0.949615	2.24821	2.81949	1.26201	1.61222	2.13508	2.99806	1.72916	2.15037	1.75141	1.75025	1.91104	1.73216	1.38777	2.02728	1.30017	1.88694	1.95867	3.16728	4.20296	5.15372	2.21546	2.50931	6.68053	1.98793	1.94521
NAMPT	6.74044	13.725	5.56797	10.2642	6.35604	7.19815	8.87553	8.47244	9.74014	7.99506	7.53759	10.0443	9.07075	11.0451	14.6275	20.8865	9.24312	6.90728	8.37247	9.8604	8.76111	15.9687	9.89983	7.38575	7.60897	17.6934	9.0597	9.11229	18.3325	12.1394	8.09931	9.75213	8.29658	2.73771	7.7003	7.11799	9.63386	8.76434	17.6764	27.6746	9.64309	18.9968	13.9458	17.0402	10.3882	6.04763	14.3236	12.3879	8.57479
NBR1	31.6998	33.5314	33.2185	36.0211	29.8298	30.0798	34.4916	34.6228	32.7151	26.0699	35.8346	30.6658	38.0165	23.1253	32.645	19.4068	26.8192	24.5932	30.8404	31.3419	32.3548	35.8929	24.5508	34.3484	22.6848	19.7823	35.1323	32.5076	16.0249	21.1772	36.2096	39.1023	36.2209	20.7056	27.9368	27.3139	31.9263	30.0369	31.4538	17.0107	29.0719	13.9231	23.0228	31.043	25.8125	23.7807	39.0989	18.4543	13.8337
NCKAP1	7.07676	8.36849	8.59701	7.66852	7.10972	9.07325	7.51973	6.5366	7.22652	7.82236	7.25588	6.44648	7.45227	8.41272	8.48534	8.27627	5.66148	8.86238	6.6349	8.64345	6.02428	8.0676	6.3649	5.84699	10.0914	6.98563	6.05214	7.4399	6.98687	9.62813	5.83331	7.73596	6.93297	10.6598	7.71627	6.12873	6.49389	6.08621	6.93552	7.84619	10.1252	7.12474	11.8583	12.0578	6.71719	7.75152	12.666	6.84131	6.21906
NFE2L2	18.5978	22.968	22.7906	24.7645	20.5997	19.3331	25.8853	18.7687	22.4807	18.9379	19.8867	24.6929	22.2777	17.9235	20.672	23.8439	20.458	18.5765	23.9217	25.1794	24.2005	26.6012	20.3594	17.1218	17.7031	31.9439	21.5995	23.8333	25.2294	24.7976	17.7728	22.5089	17.9843	12.4646	21.9326	18.469	21.8861	24.5289	21.7824	18.3009	21.012	21.0715	30.9862	32.5816	16.9189	18.0816	24.4316	27.5918	15.8781
NFKB1	12.4431	14.355	11.6589	15.5992	16.4276	7.41126	13.3658	14.3614	15.2448	11.3522	16.1425	11.1295	16.7341	13.5424	15.2166	14.1089	13.3744	13.6514	13.4408	11.9336	17.1908	13.0538	12.0933	11.3213	13.2497	16.2471	11.905	13.532	8.99115	15.5179	12.3455	15.4696	12.7085	8.84698	13.5658	11.4235	13.1338	14.1438	15.1196	9.40558	11.7952	11.0773	20.086	19.3304	18.8568	14.8868	14.2953	8.72968	12.1306
NKX2-3	11.5695	8.79889	8.69689	8.32592	9.92173	11.2472	5.64718	8.29815	7.36448	10.3863	8.22868	4.31626	7.87053	18.3987	8.60524	11.6259	10.3551	10.7991	13.7067	18.8455	5.97926	4.72824	8.01055	6.97866	20.2691	8.99517	4.99471	7.01564	6.7039	6.42008	6.43769	11.5955	9.45233	34.8052	17.9113	6.08429	5.43434	10.2382	4.77673	11.8003	17.2308	0.832735	1.32305	1.62234	0.377913	0.131612	0.244236	2.11837	3.40661
NLRC4	0.386134	0.67245	0.924026	0.619879	0.38983	0.368623	0.344216	0.506669	0.651101	0.603458	0.798506	0.405365	0.418079	1.10291	0.549034	0.75961	0.817346	0.23963	0.556139	0.412863	0.667258	0.49337	0.284435	0.493603	0.332864	0.291479	0.302934	0.343123	0.641876	0.429748	0.490001	0.754056	0.381964	0.260525	0.955263	0.425571	1.1009	0.48579	0.721716	1.19211	1.05971	0.396822	0.217103	0.287231	0.54026	1.31642	0.232178	0.23011	0.389054
NPC1	3.2622	4.32644	2.61109	4.30689	3.62121	4.25752	4.6755	3.41155	4.61978	1.81803	3.98918	4.60656	3.8675	4.25681	4.15178	3.75905	4.17463	3.3857	4.13983	3.18556	4.70944	3.01289	3.07249	3.88892	6.97037	5.04902	3.69053	4.07803	1.67194	5.04986	2.47295	3.91293	3.0869	3.28536	3.51195	2.60094	4.25581	3.49608	4.12602	2.41389	3.58674	3.52586	3.29981	4.56398	3.9501	3.99659	3.60689	2.69239	3.54972
NRG1	0.466327	0.46995	0.268323	1.00758	0.557427	0.169437	0.449531	0.355353	0.576248	0.281703	0.688781	0.955885	0.77523	0.319628	0.490413	0.852203	0.522963	0.326302	0.968436	0.421402	0.972456	0.875275	0.395998	0.684282	0.434305	2.00929	0.306455	0.573087	0.410692	0.465914	0.333112	0.717556	0.303793	0.219236	0.732988	0.455472	0.439233	0.477606	0.34715	0.368661	0.557168	0.310573	0.148048	0.495307	0.0802459	0.0452467	0.0678183	0.247745	0.0995715
NRG2	0.247673	0.195763	0.182365	0.116941	0.269933	0.132488	0.13232	0.168742	0.143794	0.246854	0.170725	0.157263	0.133431	0.837462	0.161261	0.221087	0.183868	0.32514	0.121608	0.556956	0.126812	0.188794	0.485666	0.278914	0.784941	0.183621	0.13457	0.132194	0.0503449	0.409642	0.0580373	0.196392	0.195658	1.41676	0.570107	0.0682419	0.167403	0.194746	0.0697663	0.350459	0.842256	0	0.0366456	0.0112338	0.0154701	0.0174457	0.00809361	0.00354798	0.145568
NRG3	0.048282	0.0257396	0.030472	0.042337	0.0548635	0.0484386	0.0505369	0.0584802	0.0167145	0.0527972	0.0211312	0.0560589	0.0290022	0.0880748	0.054377	0.0520445	0.0588204	0.0307315	0.0722486	0.112379	0.0211895	0.0160236	0.0451627	0.0201534	0.0699514	0.0396695	0.0233999	0.0382076	0.0249254	0.0477648	0	0.0274538	0.0379052	0.194242	0.112902	0.0110573	0.00904148	0.0253977	0.0219436	0.0709812	0.158019	0.0050631	0.0204109	0.0175196	0	0.015547	0	0.00632369	0
P4HB	147.195	179.017	145.218	146.291	157.191	248.605	186.079	127.106	156.443	142.845	149.862	114.343	130.442	194.497	182.542	265.765	170.703	147.871	133.154	103.686	149.408	118.543	141.411	117.465	107.248	151.002	145.278	148.6	134.756	179.405	134.519	129.776	130.779	74.6528	133.297	143.368	168.486	158.08	205.001	171.923	127.861	328.654	143.946	158.94	273.837	269.824	228.163	169.012	162.777
PARP1	13.466	18.1418	16.8517	17.488	33.7993	10.1053	17.6984	19.4419	15.6843	15.9313	19.1182	10.0144	15.1018	23.0129	17.9633	19.8755	17.0116	19.6892	13.4082	18.2403	17.9921	13.2581	17.35	9.06595	22.6664	17.6499	10.2663	13.6374	11.4659	22.5256	10.9833	14.9098	15.1466	26.7834	19.2613	11.1085	21.0645	16.7019	16.2261	15.8858	21.2321	19.4902	35.8471	24.1861	29.4955	39.0065	25.7598	19.1597	11.6495
PEA15	27.7339	26.6748	38.8313	22.8873	33.1148	30.9563	32.0937	27.544	24.2504	45.7606	26.4849	17.0825	20.5603	63.9985	33.3131	50.7459	28.5548	58.3978	27.245	56.4875	22.8658	21.8674	40.164	23.976	55.4486	32.5182	22.4225	21.7949	46.1984	51.192	20.0641	24.837	25.4194	135.796	48.4591	30.3497	23.0926	24.706	23.5605	88.0839	81.1898	30.8966	58.9414	33.4953	30.2776	37.2142	28.1479	31.6165	25.76
PELP1	7.38026	6.17767	8.40878	7.32094	10.6294	4.57826	8.11152	7.57008	7.20321	7.24402	8.74431	5.85061	7.4746	9.43743	8.9589	7.4709	8.11308	9.87583	6.74165	7.8214	7.92253	5.59151	9.51391	3.82846	9.7352	10.0457	4.09179	6.36927	5.2437	9.29029	6.41547	7.24599	7.47448	8.46335	9.28453	5.99026	6.68318	9.03242	6.16535	5.8388	8.54543	7.00081	8.24476	10.8259	17.0781	20.5439	6.39106	9.66309	6.81707
PEX14	8.42181	6.85813	8.59207	6.41966	7.99747	11.192	7.29744	6.84289	6.05271	8.76979	7.60082	6.0363	6.60595	7.61469	7.2025	7.27129	6.8661	7.32326	7.60878	7.07329	7.123	5.95629	7.31683	5.53469	6.41274	6.91953	6.74163	6.45423	6.76219	6.97958	7.11491	7.80497	7.68379	6.88731	7.63058	7.25608	7.70941	8.8172	6.46605	7.44475	7.19185	8.34281	7.34172	3.79342	8.25715	8.78063	4.17744	8.96887	7.56358
PEX3	3.55821	3.94958	5.05442	4.46772	4.85519	5.33488	3.77602	3.88388	4.20954	7.12052	4.46652	3.49762	4.39576	4.5499	3.83893	5.04893	3.90328	3.89826	3.90646	4.73493	4.32085	5.02918	4.14936	2.22347	4.2473	5.04821	2.6039	4.23713	10.4119	4.52472	3.66893	3.53284	3.77243	4.11052	3.81886	5.65368	4.89128	3.41078	4.04051	8.95451	5.90644	6.42579	9.87716	9.82058	4.5316	4.40052	8.26495	4.2943	4.37828
PIK3C3	1.85496	1.92429	2.17854	2.17055	2.44337	1.7123	1.69847	1.94719	2.17216	1.9858	2.04584	1.94149	2.26723	1.9807	2.11767	1.9163	1.77278	1.96975	2.22964	2.11652	2.16853	2.24565	1.67099	1.63608	2.16712	1.94153	1.68857	1.87105	1.89857	1.8898	1.81296	2.31128	2.0464	1.94271	1.90307	1.94674	1.73834	2.04627	1.80462	2.11049	2.3228	1.97057	1.62289	1.88799	2.13555	2.01266	1.78072	0.897862	0.962739
PIK3R4	4.19402	5.6528	4.7244	5.74564	5.82512	4.56995	5.75329	5.07069	5.85304	3.76909	5.5343	4.72475	5.95948	5.62855	6.62896	5.2223	4.94692	5.86502	5.32524	5.22612	5.71417	5.51787	4.5627	3.55241	5.97922	5.69816	4.02348	5.70444	3.23109	6.05787	3.65972	5.61088	5.3142	6.05514	5.61156	3.24957	5.34417	5.11579	4.9721	3.78589	5.79562	3.98863	7.84902	8.01416	4.75185	6.01016	9.173	4.57301	3.76786
PINK1	18.8483	14.1848	12.2563	11.596	11.9552	12.9578	12.0989	12.6582	15.3213	12.7129	13.027	12.0578	13.8765	9.53386	13.3981	9.48598	12.0782	10.4982	12.749	11.3984	14.749	8.63804	11.5811	17.4168	13.2057	9.67326	16.5412	11.1267	7.58634	7.78274	17.6088	13.5546	14.9479	11.1707	11.486	12.6522	11.5974	13.2165	10.3757	9.24112	13.9766	2.77723	5.39882	2.69843	5.19088	5.48688	1.96684	5.78336	4.90775
PPP1R15A	32.1279	13.3708	15.3321	14.9479	17.8481	35.5752	38.8891	15.2569	27.3541	15.1729	13.4171	23.6713	17.825	17.377	23.1075	26.2251	25.733	16.0327	23.6211	34.4763	26.6916	33.6595	32.7218	23.8278	25.2741	28.3055	30.2179	12.8702	19.8236	45.5579	23.2585	24.4006	14.5947	7.28623	26.8454	13.8801	17.9401	76.0562	13.9377	14.7204	15.9686	15.9992	38.7453	35.497	38.1012	34.8956	19.3501	31.7782	17.1094
PRKAB1	11.7061	12.4179	13.3455	12.7283	11.2029	10.1654	12.916	14.0475	12.0549	12.4869	13.9574	13.9032	16.6764	8.17966	12.4458	11.5436	11.5624	13.7539	21.1354	10.4603	18.0269	16.3948	12.1574	16.6054	13.8411	17.0448	11.0899	14.9985	24.6285	10.1982	14.6094	23.7343	14.1591	6.26984	15.9025	13.2888	13.1716	15.0349	10.6172	10.1599	10.5381	12.3179	13.17	13.8364	9.02331	6.57121	26.6379	20.3093	23.5967
PRKAR1A	16.4405	18.0508	20.1321	18.3874	23.8906	12.4983	19.9718	17.5804	16.4742	18.6154	17.8655	17.0212	15.8831	31.1152	22.1809	23.5017	17.2765	23.7493	17.3996	33.8781	18.8943	21.1192	18.7921	14.3489	26.1461	25.9801	15.6751	16.2935	14.5493	29.7254	12.5376	18.9878	16.3957	31.2161	24.6744	16.3413	19.497	18.0922	17.7773	26.795	31.686	17.1715	29.4802	32.0249	16.662	20.0084	39.3184	18.4232	13.8837
PRKCD	40.9277	36.2557	30.9396	37.8463	36.0661	44.5369	42.0362	34.45	40.3658	27.9931	39.696	47.0606	38.4814	21.5313	26.0288	31.9913	44.5774	30.5682	44.3489	28.2742	40.5292	41.0426	29.392	53.3666	18.6939	24.5358	50.1377	42.9928	25.7385	28.7644	40.4712	38.1788	36.5829	6.69053	31.8696	34.5396	45.3047	40.8844	43.0257	15.4071	22.2926	12.5754	18.2599	21.4635	24.8801	15.7663	22.6329	19.7675	23.7065
PRKCQ	0.674194	0.858457	0.961565	0.746942	1.17582	0.712996	0.912755	1.15738	0.934806	1.07684	1.18399	0.747861	0.767861	0.934746	0.556024	1.04146	2.27003	0.973133	0.71593	1.20369	0.913276	0.493302	0.71257	1.14265	0.495311	0.786191	0.535791	0.764569	0.49878	0.593448	0.575672	0.602201	0.659328	0.373746	0.703063	0.970167	1.91366	0.664611	1.216	1.05619	0.739852	1.73019	2.01707	1.29831	1.88165	1.37008	1.04365	1.09022	1.79718
PTEN	8.70395	9.48432	8.97214	10.8255	8.34586	7.76574	8.8108	9.44814	9.9191	8.82139	9.68842	8.38909	10.1741	7.54613	10.8162	6.52374	8.57728	8.56166	8.28169	10.6671	8.77945	11.3767	9.44781	7.52335	7.61185	7.38426	7.91518	9.17265	6.8295	8.12995	9.2244	11.361	9.22865	7.76502	9.61975	9.05774	9.43356	7.46518	8.67993	6.55904	9.75324	5.72087	6.21392	7.62283	8.62221	6.83266	6.65661	6.89495	4.91659
PTK6	49.5792	46.9085	31.3269	46.174	32.0606	25.5831	18.8742	40.8873	44.0659	37.0362	50.1155	62.4878	51.3124	20.8307	36.2247	29.0406	49.6915	32.12	43.5285	26.1188	41.9997	44.993	30.8387	64.4284	15.4743	24.536	55.8636	56.0587	34.5075	25.625	42.118	46.2282	48.1258	4.03254	34.9057	40.8677	52.8375	50.5376	35.4186	15.7021	17.8135	4.78397	24.2457	26.7668	19.9311	19.426	19.3157	24.1669	41.0174
RAB11A	32.8535	40.3005	37.9177	37.7163	32.526	23.9892	39.4786	37.0485	37.0813	38.1157	35.3598	36.4379	38.1753	27.3803	32.8645	47.5888	31.1959	33.3028	33.7859	35.2898	31.2596	42.0732	30.3499	34.4205	29.2726	38.6022	39.6137	38.2894	39.6353	40.6269	32.5274	33.1756	32.3302	18.1119	31.6088	40.7442	39.5873	31.698	43.5665	42.2659	31.802	34.6694	29.4575	34.7918	29.4369	28.4116	25.8503	33.6571	34.8306
RAB1A	62.3864	72.037	69.6218	73.8298	63.1711	60.1454	73.1592	62.3368	67.97	80.4376	65.1998	65.5185	66.7005	64.5666	65.1749	88.0901	64.5865	58.856	66.2792	64.0696	67.5151	83.2544	51.6322	58.7354	56.2348	77.4713	65.5057	72.4382	96.819	78.8115	65.5497	64.8394	56.6212	39.1231	64.5657	74.3459	79.4713	58.2609	77.442	88.7171	65.4314	91.3291	91.007	64.0259	59.1989	60.4035	69.6951	68.0711	62.1275
RAB24	3.48144	2.67636	4.64036	1.94376	3.02679	3.13793	3.20249	3.13267	2.37427	4.50635	3.85112	2.45548	2.43621	2.7781	2.92876	2.83053	4.24132	2.31837	4.80238	1.65614	3.33088	2.65657	3.1337	2.64002	1.86703	2.37499	3.08206	1.90817	2.2162	1.44972	3.93811	2.86583	2.26238	2.00776	2.45796	4.54906	5.15213	4.11716	2.64995	3.59145	1.92444	3.51935	2.0053	1.78887	4.31176	7.08354	1.86016	5.90219	5.14358
RAB33B	1.34633	1.61559	2.69988	1.53418	1.98386	1.85067	1.42402	1.5984	1.54276	2.74285	1.73087	1.18754	1.87823	2.08086	1.59073	1.51125	1.43676	2.16117	1.68537	2.83406	1.48199	1.68911	1.73879	1.11814	2.14984	1.62068	1.13007	1.33933	3.41952	1.84127	1.23611	1.89358	1.57919	2.75134	1.99826	1.96869	1.44562	1.73789	1.15474	4.84987	2.96222	4.63753	2.70546	3.00439	2.94831	3.3601	4.49649	1.57562	1.47686
RAB5A	14.1229	18.1427	16.1564	16.9631	14.5114	15.1806	17.4539	14.9304	17.0485	14.3681	15.4324	16.226	15.9807	13.2869	14.1413	18.6507	14.565	13.878	15.6901	17.3744	14.7651	18.8309	12.4014	15.8976	14.2292	17.7283	16.5994	16.4648	12.3649	16.6004	12.9392	16.0997	14.6185	10.238	13.7813	13.8317	15.9626	14.0048	17.1137	14.5275	14.849	13.7254	16.8701	22.93	13.8865	14.3074	18.712	16.5157	11.3117
RAB7A	105.125	100.595	105.131	97.2291	115.007	92.458	100.932	100.565	102.8	115.11	96.1874	118.401	100.636	99.6788	90.1545	101.631	94.847	100.444	92.7998	102.061	91.5057	107.28	78.3574	109.285	98.9121	95.5848	111.81	99.3491	107.075	100.821	108.271	96.6123	92.342	75.0287	106.876	114.611	102.654	99.3825	97.2132	111.234	94.4196	95.2629	139.492	94.9378	77.1655	82.359	108.066	105.152	70.2112
RAC1	114.798	134.665	98.1555	114.644	95.4917	98.866	112.231	115.875	126.306	111.163	102.09	124.421	121.397	91.6218	106.073	128.328	134.517	99.001	109.822	114.133	103.665	130.911	108.397	133.835	96.4498	121.512	128.422	136.712	153.728	108.951	126.414	110.298	120.576	72.1864	117.382	126.564	128.813	106.114	139.909	102.864	109.921	110.324	147.945	127.606	116.729	103.861	109.655	134.784	101.496
RAF1	13.3546	12.916	13.8627	12.9352	13.8901	17.1005	13.0312	13.039	13.0183	14.643	14.5516	12.5945	15.0398	12.701	14.8346	13.1699	13.7467	12.6305	16.0381	12.6662	13.8855	13.2673	12.5085	11.9648	12.7774	14.5576	13.1057	13.628	13.5138	12.5147	12.5441	14.6685	12.3727	12.712	14.6416	13.3077	14.3618	13.743	13.6114	12.2101	13.5205	9.94869	11.0028	13.2264	12.5794	16.8296	13.7857	13.0878	10.595
RB1	6.37409	9.75591	8.2843	7.73818	8.2269	5.47594	6.99429	7.33808	7.69564	8.72875	7.68605	7.13631	7.83542	7.14221	8.4944	7.93138	6.88449	6.59822	7.45483	7.56102	7.00343	9.17581	7.06739	6.12249	6.49506	8.68383	6.11795	7.40307	12.4393	7.13331	6.31968	7.02549	7.45772	4.59805	7.04208	7.67282	9.01705	5.54749	8.17879	11.1115	8.27695	8.69184	16.1067	22.738	6.91429	12.5875	13.1353	12.5794	9.58391
RB1CC1	5.1821	5.71657	6.84652	6.14732	5.917	8.14836	5.4799	5.25653	6.59058	5.63825	5.6101	6.26661	6.9715	5.87552	6.29675	4.57076	5.16025	5.75174	6.9746	6.67106	5.5042	7.11326	5.00344	6.61768	6.58492	4.08221	5.78226	5.95278	5.90687	4.87435	5.64963	6.93257	5.52403	5.89197	5.12037	5.65612	5.43797	5.6895	5.1861	5.58187	6.88505	5.67558	10.6664	14.1511	5.67481	4.83068	10.1751	4.71524	3.20313
RELA	18.5355	18.3259	17.9474	15.472	18.71	15.0487	18.4862	19.5709	15.9575	18.2438	18.3677	13.9893	16.5486	18.6103	18.5787	19.345	17.6867	16.7208	16.4981	17.0819	20.4921	13.513	15.3087	14.3986	18.8998	24.8191	17.0783	14.7747	14.6181	16.8801	17.8082	18.4283	18.2966	17.3845	17.8879	15.7296	18.8377	19.1277	17.2358	16.4459	19.3926	17.3143	17.5862	22.6493	24.5838	20.078	19.095	12.8318	25.2966
RGS19	3.76058	5.37169	4.78853	4.10505	10.4598	2.0746	3.54741	9.01229	5.39951	6.1291	8.44523	3.20129	5.59237	5.5996	4.10902	7.12176	7.09276	3.6014	6.00803	4.8834	6.00605	3.24605	3.52973	4.73793	2.11103	3.0384	4.08929	3.50374	6.40836	1.91135	5.40299	4.62608	3.53606	1.83185	6.16074	6.0839	10.2435	4.23462	5.87222	8.71046	4.56131	3.58356	5.03326	1.21434	3.88472	3.92717	2.97644	1.24942	6.53519
RHEB	10.4457	11.5717	13.1017	11.0743	10.2575	10.3207	11.708	9.82912	10.6559	17.9219	9.19269	10.9188	10.1159	15.4437	9.2342	14.5506	11.2909	11.8611	11.0335	15.936	10.5801	12.7253	9.90888	12.0773	15.55	10.7717	11.2096	11.0188	24.8981	14.7394	7.74628	9.81811	9.68619	15.5257	13.3349	15.3731	10.3392	10.6528	10.9251	31.6801	19.4511	25.8181	48.7719	25.4602	10.5102	16.4847	20.9874	31.3933	15.5551
RPS6KB1	2.45756	2.63054	3.77656	2.75478	3.49467	2.72064	2.77653	2.99134	2.83799	3.52719	3.0395	2.51214	2.86467	3.35833	3.32903	3.02681	2.9108	3.1893	3.87623	3.24713	2.68205	3.15063	2.94265	1.84171	3.53547	3.79858	2.06119	2.82141	3.24976	3.4555	2.14208	3.29683	2.56357	3.10797	2.81725	2.87453	3.40642	2.83765	2.6496	3.48136	3.167	2.92981	4.51158	6.9226	4.79084	5.80356	6.56754	3.62587	2.0176
RPTOR	4.801	4.06482	3.7943	3.76663	4.96088	3.55869	4.45906	3.98353	4.012	3.57231	4.57293	2.98544	4.12046	6.61593	5.43224	4.71927	4.47349	6.18282	3.75656	4.65175	5.26739	2.77426	4.96076	2.72901	6.25017	6.56822	2.68459	4.23292	2.49908	5.35963	3.72032	4.84409	4.62363	8.6218	5.2147	2.44603	3.62168	5.37596	3.65303	3.40755	5.80824	4.36799	5.75341	6.41538	5.02461	6.54882	10.189	3.9251	4.79038
SAR1A	9.08243	11.3335	13.6283	11.5272	11.1701	8.91898	9.96525	10.3553	10.6695	13.2751	10.7518	10.0377	9.64632	13.1159	11.987	13.6626	9.45904	12.0676	10.7359	12.8571	10.6996	12.8067	9.95852	8.11901	12.1378	13.4774	10.0356	10.513	13.2383	13.4577	8.56023	10.0346	9.38753	10.6038	11.7647	11.1127	12.0284	9.8032	11.2655	16.4543	12.7271	19.6185	13.8142	12.6244	13.8084	21.0879	17.482	15.3573	10.8216
SERPINA1	25.6598	58.7183	115.238	44.8464	63.613	534.532	46.2588	40.6904	32.5994	55.8073	47.3399	15.6802	42.4853	144.09	53.2607	52.1955	57.5304	28.9991	69.9372	23.6186	40.3152	27.0491	9.49765	46.1949	17.7807	13.5142	78.5721	29.5078	24.2527	39.6112	29.112	38.5965	29.6619	3.2952	22.6998	80.3712	59.6711	29.5458	48.8186	49.5347	21.8271	100.028	7.50136	27.8951	417.734	31.9512	2.35828	249.183	54.2938
SESN2	15.1718	21.4918	14.032	17.8909	12.9931	20.5846	15.3561	12.4432	19.2319	14.3988	19.9332	14.9178	15.6812	11.4254	17.5491	12.0949	18.2797	11.2722	15.3481	8.43233	16.0188	16.146	12.6208	20.041	10.3708	9.37407	22.7238	22.9679	9.29216	7.14131	18.6772	14.2855	21.0685	5.39127	11.7142	15.7707	18.6196	13.2374	21.0154	7.8405	9.40042	9.49709	6.24201	6.45555	7.22268	6.26292	2.81816	6.91541	12.6852
SH3GLB1	20.7432	22.4532	24.4301	21.9431	19.6818	15.2993	21.7247	23.1561	19.5399	28.9088	18.962	19.6069	21.2856	18.3758	22.9094	24.2723	17.8568	23.2542	23.3987	23.9911	20.0285	23.6161	17.8099	20.713	20.9751	20.5049	26.7044	15.6515	21.7274	22.817	18.446	23.6284	20.5387	20.7158	20.6084	26.24	21.1098	18.4805	21.4772	26.5822	22.344	13.4278	16.9827	19.1511	18.5559	19.2524	19.3097	19.605	13.5782
SIRT1	4.87359	4.78105	6.31098	5.44428	6.33549	5.05762	5.01645	6.20094	5.07301	5.15353	5.21874	6.89846	6.82325	6.13744	5.22476	5.53511	4.56538	4.90259	6.05407	7.35289	5.67947	5.60739	5.84281	4.13275	6.06525	8.9914	4.59312	4.76204	4.65018	8.17126	4.30985	6.64714	5.85933	6.49435	6.40004	4.41167	4.14146	6.09506	4.65473	5.83284	7.72679	3.41385	6.25556	6.86173	5.80276	6.48025	7.37932	6.8221	3.1084
SIRT2	7.80446	6.79606	8.80292	6.37469	7.10182	9.58457	5.42518	6.85567	5.55047	10.6989	7.50103	4.65967	6.79955	9.70448	6.81144	7.44324	6.93322	6.69017	7.60974	8.0246	6.40337	5.34062	7.76248	6.53645	8.296	7.17258	5.8446	6.4918	8.61633	6.7283	8.58197	7.28781	7.20031	9.37535	8.97888	7.7627	7.23905	7.47846	5.72821	9.67526	9.19105	6.74597	9.84341	5.78826	7.04044	10.4428	3.98511	7.92826	7.98901
SPHK1	0.562466	0.900038	0.664974	0.620919	0.790092	1.24482	0.650096	0.873178	0.611117	0.495229	1.06304	0.525823	0.616243	1.31506	0.85206	1.92563	1.27878	0.710977	0.793508	0.763683	0.827464	0.542914	0.713235	1.43899	1.19443	0.894164	1.2363	0.899608	1.28254	0.760207	0.525498	0.670057	0.518079	0.715768	0.919507	0.81914	1.23577	0.826499	0.504066	1.07614	1.14945	1.13979	0.675156	0.528925	2.40156	3.41953	0.430779	1.09672	1.69217
SPNS1	0.788796	0.627357	0.835537	0.466092	0.699959	0.595251	0.887759	0.67791	0.726585	0.759155	1.18709	0.6186	0.616791	0.545622	1.25203	0.467397	0.927246	0.62832	1.17172	0.269311	0.850261	0.353634	0.815501	0.350432	0.436631	0.835697	0.293425	0.53234	0.420072	0.515667	1.14412	0.817041	0.623613	0.411363	0.967855	0.665536	0.592579	0.747357	0.557663	0.379765	0.57243	0.995509	1.0265	0.997592	0.866687	0.940973	1.39888	0.765473	1.2146
SQSTM1	38.6929	32.2806	28.9865	31.3332	26.5649	33.298	37.5499	34.6909	33.6544	28.5783	28.3136	37.9034	35.3814	29.5044	27.2928	27.8711	37.1265	33.4066	29.6713	27.5598	33.3133	26.4446	23.1015	41.9588	45.5042	33.2306	45.9642	32.8277	27.4448	17.7092	41.1386	33.6153	36.5019	28.7413	36.2007	29.7008	39.2678	35.1243	31.5833	20.6176	35.0003	38.2685	28.6469	27.0585	33.175	21.5835	35.4408	52.0916	43.5838
ST13	40.7329	45.0213	65.3323	58.2649	45.4686	54.548	38.2353	44.2566	43.2533	55.1191	46.2876	28.6194	43.2216	53.004	40.3216	41.6883	36.7976	40.3676	37.1459	59.4681	39.4612	44.8296	38.3294	28.1653	50.785	46.4256	29.9072	45.877	54.8975	46.5766	48.8494	46.1606	48.0152	54.1654	49.6669	45.1892	35.5798	36.2709	37.636	51.9146	59.8963	47.5146	65.1399	57.6427	54.3562	42.6836	61.5482	80.8225	24.2072
STK11	9.34426	7.54418	7.67194	7.62131	7.38119	6.71861	8.93082	8.76008	7.99444	8.13944	10.1656	6.56055	8.50003	6.68954	10.7815	6.51489	9.66699	7.72998	9.07204	5.84733	9.95443	6.94745	10.1377	5.70509	6.25341	9.82846	6.44837	8.61009	6.95985	5.75682	10.4645	8.65551	7.63547	5.11518	8.53276	7.696	9.22847	9.41638	6.69925	3.99231	5.78676	7.16093	6.84487	9.49383	7.47896	12.9705	8.18134	10.0892	17.599
TBK1	3.86056	5.24241	5.37683	5.16489	4.88607	6.12331	5.07408	4.81095	4.92537	6.28887	4.9785	5.32399	4.88373	5.27796	5.37385	5.99463	4.86429	4.66199	4.98744	4.53344	5.08176	6.6304	4.23304	4.60433	5.35444	5.75155	4.81953	4.85286	5.94145	4.64409	4.05108	4.70415	4.46927	4.00412	4.70623	5.68833	6.18732	4.22448	5.9443	7.17211	5.43488	5.73784	8.30886	8.64495	7.34688	5.09193	6.16121	5.57014	3.58257
TM9SF1	2.43877	1.99372	2.63709	2.03204	2.27612	1.3592	2.50814	2.13703	2.3056	2.37924	2.44907	1.64841	1.6765	2.01469	2.47364	2.3782	2.53114	1.79472	2.46775	1.2627	2.63414	1.70082	1.84625	1.57066	2.02682	3.14381	1.53138	1.87705	1.83054	2.07008	2.24847	2.08711	1.64744	1.21315	2.20099	2.19667	2.10746	2.2101	1.88854	1.71727	1.18997	2.96308	2.43	3.34228	2.67624	2.60358	1.41739	1.28803	1.64811
TMEM74	0.133758	0.0857133	0.205929	0.045931	0.104162	0.0640461	0.0534564	0.0147282	0.0540223	0.442124	0.0447038	0.0411787	0.0306776	0.310543	0.109559	0.12452	0.0296278	0.479863	0.0557246	0.321943	0.00622599	0.0847461	0.126064	0.0888236	0.624825	0.0437096	0.0464094	0.0729711	0.228499	0.168414	0.00701395	0.114949	0.126967	0.684876	0.334751	0.126707	0.0637586	0.0746247	0.0193427	0.942692	0.406262	0	0.0719665	0.0308861	0.0162032	0.00685215	0.0381472	0.00557417	0.0326714
TNFSF10	46.6736	55.8426	58.9349	48.1555	45.9044	60.5271	47.8106	42.7147	55.8337	62.0828	46.0742	55.7664	50.826	36.1708	32.0033	47.6885	68.8749	27.5182	43.6888	39.8605	39.151	59.0991	32.6427	106.339	30.3408	20.972	56.7536	66.6608	74.2586	17.6633	66.0397	43.2762	59.1768	10.2949	32.0849	64.6652	52.4605	37.3507	98.0679	135.97	37.2986	20.9256	17.092	21.1594	58.3749	8.93443	13.2828	25.2028	12.8963
TP53	18.7451	18.2427	17.6242	21.2224	26.49	8.64111	22.107	19.9808	20.0129	22.1229	24.1149	11.5642	22.5245	17.4603	23.0534	16.3975	20.1837	22.4312	16.6301	15.9114	20.6563	15.3933	22.4885	9.21505	14.3444	23.3294	11.5978	17.5605	15.6614	16.8517	19.2819	21.6599	20.3148	9.28208	19.5086	20.1903	20.0048	20.6623	17.018	13.9946	13.8296	23.1355	34.1029	4.02176	54.2203	52.4194	3.74568	31.7397	47.7142
TP53INP2	75.0563	59.3815	22.7493	54.7147	41.7321	27.7865	61.0739	44.8786	64.0563	30.0269	46.2576	108.104	86.2101	25.8358	30.9571	32.7108	78.5559	34.8543	67.4517	49.0099	72.9239	68.4407	41.2251	125.194	64.721	59.3785	61.1703	63.5573	36.1264	40.339	103.697	48.4832	45.2809	32.1514	61.0343	34.2756	67.0901	62.154	50.6561	32.5559	48.4571	5.19311	8.86368	16.1199	12.5473	2.53181	4.80218	7.69982	17.085
TP63	0.0187732	0.0369746	0.0172786	0.0354557	0.106251	0.0432594	0.0550198	0.0776897	0.0227464	0.0359254	0.0690168	0.146222	0.0355216	0.116705	0.0370002	0.177066	0.0600357	0.0896184	0.0307255	0.0669089	0.115345	0.0327092	0.0512175	0.0411396	0.0761564	0.367776	0.0437862	0.0411634	0.0373125	0.125361	0.0189501	0.0233508	0.0257922	0.0881132	0.0593635	0.0376191	0.0707501	0.0547251	0.0174198	0.135236	0.143363	0.0137806	0.0138884	0.0221391	0.0437774	0.158682	0.0245393	0.0344231	0.0126101
TP73	0.225018	0.126547	0.144735	0.134332	0.693145	0.0227045	0.13897	0.179609	0.198474	0.141886	0.320122	0.0630632	0.126153	0.208588	0.166036	0.175642	0.226868	0.174503	0.186257	0.133444	0.243667	0.0420598	0.146771	0.136029	0.101425	0.19338	0.129424	0.0787992	0.0747725	0.150964	0.202895	0.0926521	0.108025	0.00910463	0.0577313	0.14512	0.393285	0.149204	0.145369	0.0993688	0.113571	0.129103	1.33787	0.138899	1.04083	3.26472	0.47061	1.29471	0.54899
TSC1	2.192	2.63448	3.83877	2.89493	4.26117	2.26507	2.52591	2.35715	2.51906	2.6006	3.63133	2.68476	3.92274	4.64961	3.8263	2.12692	2.51994	4.1362	4.62631	2.73175	3.3905	2.68964	3.4938	1.98193	3.18602	2.33209	1.88607	2.47344	1.42098	3.18294	2.74254	3.55982	2.37434	3.73801	3.02811	2.26627	3.00988	3.77358	2.1037	2.09474	2.9348	3.03673	2.71997	3.74768	4.03563	4.07162	4.64348	3.27177	2.47057
TSC2	9.90594	7.59395	9.02642	7.34923	9.38318	6.75036	8.13615	6.83802	7.77549	6.41316	10.0421	6.2831	9.82115	8.08236	10.0227	6.94791	8.31812	7.74876	10.3342	6.42374	9.12279	5.82442	9.53151	5.69105	8.85628	9.46451	6.7461	7.67738	4.16517	7.22461	7.76246	10.2797	8.99992	7.44329	8.11231	6.10699	8.08635	11.2164	5.96637	3.65811	6.58525	3.61151	8.34446	8.63287	14.2499	12.4369	6.31594	7.06597	12.8218
TUSC1	11.4823	8.46167	9.99228	7.19641	8.28252	7.59521	10.2429	9.11338	9.92218	9.14593	10.6133	7.29764	9.22594	7.06945	11.7125	7.36925	9.83449	6.7062	8.89549	9.14331	11.8542	8.6143	7.88853	6.54223	7.15812	12.0727	6.2827	8.03518	9.21671	7.55597	12.5972	10.0346	8.95693	7.91188	10.9216	10.9186	8.84986	8.88286	6.97871	8.5501	9.48787	5.81931	7.27492	4.02107	0.454354	5.3319	6.02588	5.73639	11.8869
ULK1	5.12939	4.41197	5.64748	3.65618	5.38225	6.13959	4.13055	4.63015	3.65861	4.42324	4.99823	4.13279	5.14305	6.5948	5.61636	3.37546	4.17345	4.42534	6.14113	4.61379	6.13082	3.6053	5.78584	3.72167	5.89457	4.36695	4.16129	4.40236	2.10703	4.52401	4.82994	5.48161	4.86198	7.87758	5.40221	3.91059	5.07528	6.166	2.69174	3.21781	5.88182	3.19988	4.83873	3.00002	7.45695	6.96248	3.30825	5.87892	5.87472
ULK2	1.27417	1.20844	1.99414	1.01192	1.30045	0.804958	1.04859	1.026	0.894295	1.91802	1.17816	0.816047	1.30765	2.8377	1.5431	1.06697	0.941762	1.57904	1.50079	2.22221	0.980865	1.0032	1.54758	0.841174	2.72022	1.14982	0.661669	0.999165	1.06861	2.02352	0.881543	1.53668	1.15435	3.13618	1.98861	1.09111	0.913161	1.30654	0.627555	2.23601	2.64973	0.140884	1.31679	1.10525	1.69786	2.31525	1.11872	0.884692	0.697112
ULK3	16.3825	22.2413	15.9785	12.8723	14.1301	29.544	16.2183	15.9281	15.4675	16.5273	20.5027	17.0024	16.8812	8.21159	15.2456	12.4788	18.0794	11.9569	23.489	11.7531	16.822	17.1512	16.6077	17.2786	9.47865	13.5838	22.2365	16.3787	17.9421	9.42496	20.4374	16.2523	16.6118	4.89188	12.526	16.4292	23.3074	21.3596	15.9909	8.95605	9.08001	10.3567	7.72012	9.66145	13.2651	19.8875	5.98273	13.6058	15.0243
USP10	10.8675	15.1193	15.0966	17.6943	15.1433	11.5457	14.9131	13.8298	13.9069	14.0356	16.7165	10.7167	15.0948	13.4555	16.3786	15.1827	12.8035	15.7662	12.7063	13.204	14.1662	12.1276	14.3757	7.79926	13.7227	16.8478	9.11206	15.107	14.0076	16.2764	13.1524	14.3067	12.5535	11.7181	13.9286	11.3643	14.7147	13.9216	13.2909	11.8471	13.9544	18.8142	32.326	28.2354	17.8882	21.9631	33.2005	17.2263	15.1358
UVRAG	3.00435	2.90937	3.62135	2.80587	3.76411	2.89357	3.03994	3.09971	2.84054	3.56938	3.34085	2.57011	3.04295	4.54533	3.26886	3.22066	2.93211	3.29521	3.33158	3.59308	2.81147	2.71246	3.05324	2.53185	3.85402	3.04878	2.3636	2.56778	2.51968	3.75948	2.41438	3.15123	2.70586	5.68376	3.34379	2.76792	3.64225	3.20421	2.86772	3.5518	4.67904	1.76267	3.61812	4.6584	2.34845	3.31457	4.04879	3.89308	2.48603
VAMP3	49.0027	45.3777	46.1142	47.112	36.3268	50.4269	38.1947	40.234	47.0669	57.7781	47.3599	39.5333	43.0584	38.4785	37.2587	51.0383	41.8089	34.0139	46.1043	43.1018	40.6399	45.6416	35.9574	48.9672	35.7107	40.9971	40.1474	48.0961	52.978	34.2517	48.8978	47.3738	46.3154	37.7479	42.684	50.3117	48.2842	36.9494	49.9093	51.5154	47.1398	54.0398	50.5842	35.7553	38.5432	35.4203	46.1796	44.7522	38.4326
VAMP7	16.1408	17.6223	13.5604	18.0849	15.6907	23.5766	15.9029	15.1412	16.365	19.5879	15.512	15.1743	16.7782	16.9525	16.5902	19.3782	15.9564	13.5089	15.5863	17.6674	15.36	19.457	14.3219	14.2768	14.8108	18.8511	15.4308	16.4821	19.0936	16.1496	14.4364	16.9489	14.5183	14.5452	15.6058	14.6357	18.2436	13.661	18.5288	19.2585	19.4834	17.7459	40.0354	23.8129	12.3927	10.681	19.9033	10.2884	8.42329
VEGFA	3.4339	4.37152	3.41109	4.97793	2.95914	7.62166	4.75666	4.43179	4.19737	1.79069	4.56456	6.11279	4.34539	2.68171	5.86317	4.06733	3.48641	3.27118	6.6704	3.81808	3.5735	7.76334	4.77649	3.8946	2.80275	4.6777	4.38251	5.11519	3.07316	5.14903	5.33179	5.68813	4.82004	1.58584	5.34255	2.75147	3.21272	8.79997	2.95771	1.78624	2.49459	8.75517	16.0218	11.0686	7.73176	14.6619	8.9715	44.449	18.5177
WDFY3	1.78074	2.04815	2.28769	2.09512	2.32643	1.6379	2.02147	1.74208	1.85082	1.63104	2.14914	1.85972	2.15028	3.51777	3.20814	1.57722	1.64729	2.65394	2.54083	2.03736	1.80864	1.97682	2.10411	1.28763	2.91311	2.47237	1.39413	1.81648	1.03351	2.65584	1.2187	2.58773	1.89792	2.73365	2.15571	1.22772	1.57387	2.21752	1.58138	1.70725	2.5993	1.61034	2.9959	2.83842	2.04792	3.07002	3.20124	1.22731	1.52514
WDR45	5.42327	5.96742	7.02048	5.20979	6.17789	7.77349	5.38203	5.94926	5.56341	9.03086	7.1292	5.29418	7.03317	6.60207	6.98734	6.32568	6.65456	5.36301	7.65813	6.56291	6.46117	6.20421	7.18811	7.3013	6.55734	5.89464	5.19244	5.16193	8.41494	4.60424	8.2203	6.52714	6.69031	5.49315	7.77969	7.47975	6.85828	7.04469	4.96865	7.11997	8.2965	7.80147	14.2946	4.54497	8.71462	9.18796	4.5239	7.63899	7.75253
WIPI1	12.6587	13.3928	13.0536	12.1821	12.9992	5.35305	15.4407	13.0366	11.3508	14.8377	12.085	10.0781	15.1812	13.0411	16.9494	14.2992	13.5989	9.62816	14.9992	9.61288	13.8001	15.7192	10.3692	9.02898	6.53549	7.31893	11.3818	13.4338	16.4029	11.9636	13.951	15.6099	12.1163	4.00603	9.83935	16.0153	18.4269	15.6888	15.807	13.2705	8.69715	8.08446	8.26487	12.5002	15.9226	8.84274	11.9363	8.55583	11.9083
WIPI2	7.77656	7.03068	8.8178	7.14851	7.37033	6.5409	6.82044	7.76471	7.54549	8.75771	7.40463	5.9097	8.18327	7.75505	7.54687	5.91043	7.22591	6.77664	7.43952	7.24892	8.33853	6.369	7.00651	6.33289	6.58445	6.39899	6.26012	7.1166	5.77396	5.47067	8.51718	8.51188	7.65852	7.41932	6.99658	7.55305	7.24631	7.63643	5.87463	6.74822	8.53747	6.96568	16.2603	8.06308	9.33165	9.61196	9.62564	8.27479	8.44986
ZFYVE1	5.29768	6.04177	6.3111	5.45098	5.49855	5.37397	5.549	5.21212	5.68261	4.69781	6.0517	5.22023	5.89117	5.82245	4.98255	4.01193	5.22905	4.95199	5.85304	4.83404	4.97935	4.12025	5.25966	5.89177	5.70594	2.59279	6.04774	6.31841	2.02046	3.47004	6.19522	6.55749	6.23217	5.97256	4.95466	5.10513	5.298	5.15496	4.40842	3.40611	5.40634	2.65222	3.23488	3.02642	4.45433	2.90912	3.12329	2.48139	2.47124
[truncated: 472 more columns]
